# Supplementary material
Source: publisher figshare collection journal article supplement (https://acs.figshare.com/ndownloader/files/4204045)
Supplement: Supplementary file 1 [file 4204045]

## Supporting Information

### ADME-Guided Design and Synthesis of Aryloxanyl Pyrazolone Derivatives to Block Mutant Superoxide Dismutase 1 (SOD1) Cytotoxicity and Protein Aggregation: Potential Application for the Treatment of Amyotrophic Lateral Sclerosis

*Tian Chen<sup>1</sup>, Radhia Benmohamed<sup>2</sup>, Jinho Kim<sup>3</sup>, Karen Smith<sup>3</sup>, Daniel Amante<sup>3</sup>, Richard I. Morimoto<sup>5</sup>, Donald R. Kirsch<sup>2</sup>, Robert J. Ferrante<sup>4</sup>, Richard B. Silverman<sup>1,6\*</sup>*

<sup>1</sup>Department of Chemistry Northwestern University, Evanston, Illinois 60208-3113 USA,

<sup>2</sup>Cambria Pharmaceuticals, Cambridge, Massachusetts, 02142 USA, <sup>3</sup> Neurological Surgery, Neurology, and Neurobiology Departments, University of Pittsburgh, Pittsburgh, PA 15213, USA and the Geriatric Research Educational and Clinical Center (00-GR-H), V.A. Pittsburgh Healthcare System, 7180 Highland Drive, Pittsburgh, PA 15206, USA, <sup>5</sup>Department of Molecular Biosciences, Rice Institute for Biomedical Research, Northwestern University, Evanston, Illinois 60208-3500 USA, and <sup>6</sup>Department of Molecular Biosciences, Chemistry of Life Processes Institute, Center for Molecular Innovation and Drug Discovery, Northwestern University, Evanston, Illinois 60208-3113 USA.

## Table of Contents

|                                                                                                                  |     |
|------------------------------------------------------------------------------------------------------------------|-----|
| 1. Experimental details and data for <b>35</b> , <b>36</b> , <b>39</b> , <b>41</b> , and <b>42-47</b>            | S3  |
| 2. HPLC data and spectra for <b>1-19</b>                                                                         | S7  |
| 3. HPLC spectra and data of microsomal stability of minaprine and <b>1</b>                                       | S29 |
| 4. Data and spectra of metabolite profiling of <b>1</b> and <b>3</b>                                             | S33 |
| 5. Bioanalysis data of in vivo mouse steady-state level study and in vivo blood brain barrier study of <b>13</b> | S38 |
| 6. Effect of <b>13</b> on hERG Potassium Channel                                                                 | S42 |
| 7. Effect of <b>13</b> on Enzymes and Receptors                                                                  | S43 |

## Experimental details and data for **35**, **36**, **39**, **41**, and **42-47**.

**2-Bromo-*N*-methoxy-*N*-methylacetamide (36).** <sup>1</sup> *N,O*-Dimethylhydroxylamine hydrochloride (16.0 g, 164 mmol) and K<sub>2</sub>CO<sub>3</sub> (50.0 g, 362 mmol) were dissolved and stirred in Et<sub>2</sub>O (200 mL) and H<sub>2</sub>O (200 mL) at 0 °C. Bromoacetyl bromide (15.68 mL, 181 mmol) was added dropwise to the reaction at 0 °C, which was stirred for another 30 min after the ice bath was removed. The layers were separated, and the aqueous layer was extracted with Et<sub>2</sub>O (2 × 200 mL). The organic layers were combined, dried over Na<sub>2</sub>SO<sub>4</sub>, and concentrated in vacuo to afford **36** (22.0 g, 74%) as a yellow oil. Compound **36** was directly used in the next step without further purification. <sup>1</sup>H NMR (500 MHz, CDCl<sub>3</sub>, δ): 4.02 (s, 2H), 3.80 (s, 3H), 3.23 (s, 3H).

**Biphenyl-3-ol (39).** 3-Bromophenol (1.05 g, 6.07 mmol), phenylboronic acid (1.48 g, 12.1 mmol), K<sub>2</sub>CO<sub>3</sub> (2.00 g, 14.5 mmol), and PdCl<sub>2</sub>(PPh<sub>3</sub>) (1/200 eq.) were added to a solution of dioxane/H<sub>2</sub>O (20 mL/5 mL). The resulting solution was refluxed for 16 h. The reaction mixture was then partitioned between Et<sub>2</sub>O and water, and the aqueous phase was extracted with Et<sub>2</sub>O. The combined organic layer was evaporated to dryness

and purified by flash column chromatography (ethyl acetate/hexanes = 1/9) to give **39** (1.02 g, 98%) as a transparent oil. <sup>1</sup>H NMR (500 MHz, CDCl<sub>3</sub>, δ): 7.57 (d, *J* = 7.2 Hz, 2H), 7.44 (t, *J* = 7.6 Hz, 2H), 7.37-7.30 (m, 2H), 7.17 (d, *J* = 7.7 Hz, 1H), 7.07-7.06 (m, 1H), 6.83-6.81 (m, 1H), 4.94 (br, 1H).

**5-Phenylbiphenyl-3-ol (41).** 3,5-Dibromophenol (1.0 g, 3.97 mmol), phenylboronic acid (2 g, 16.4 mmol), K<sub>2</sub>CO<sub>3</sub> (2.7 g, 19.5 mmol), and PdCl<sub>2</sub>(PPh<sub>3</sub>) (1/200 eq.) were added to a solution of dioxane/H<sub>2</sub>O (20 mL/ 5 mL). The resulting solution was allowed to reflux for 16 h. The reaction mixture was then partitioned between Et<sub>2</sub>O and water, and the aqueous phase was extracted with Et<sub>2</sub>O. The combined organic layer was evaporated to dryness and purified by flash column chromatography (ethyl acetate/hexanes = 1/9) to give **41** (0.83 g, 83%) as a transparent oil. <sup>1</sup>H NMR (500 MHz, CDCl<sub>3</sub>, δ): 7.61 (d, *J* = 7.2 Hz, 4H), 7.43 (t, *J* = 7.6 Hz, 4H), 7.37-7.33 (m, 3H), 7.07 (s, 2H), 6.10 (br s, 1H).

#### Weinreb amide method B1.

**2-(3,5-Dichlorophenoxy)acetic acid (35).** To a solution of 3,5-dichlorophenol (60.0 g, 366 mmol) in EtOH (25 mL) was added NaOEt (21 wt% in EtOH, 137 mL, 362 mmol) at room temperature. The reaction was left stirring for another 10 min. To the reaction mixture, ethyl bromoacetate (20.5 mL, 370 mmol) was added. The reaction was gently brought to 70 °C overnight. NaOH (1 N in H<sub>2</sub>O, 420 mL, 420 mmol), and 100 mL H<sub>2</sub>O was added. The reaction mixture was then brought to 90 °C for 4 h. After ethyl 2-(3,5-dichlorophenoxy)acetate had disappeared by TLC analysis (ethyl acetate/hexanes = 1/9), the solution was cooled. Then it was washed with chloroform (3 × 500 mL), adjusted to pH 3 with HCl (1 N), extracted with chloroform (5 × 500 mL), and concentrated to dryness to give the 3,5-dichlorophenoxyacetic acid **35** (70.0 g, 86%) as a white solid. <sup>1</sup>H NMR (500 MHz, CDCl<sub>3</sub>, δ): 10.78 (br s, 1H), 7.03 (s, 1H), 6.83 (s, 2H), 4.68 (s, 2H).

**2-(3,5-Dichlorophenoxy)-*N*-methoxy-*N*-methylacetamide (42).** To a solution of *N,O*-dimethylhydroxylamine HCl salt (5.30 g, 54.33 mmol) in DCM (250 mL) was added DIEA (24 mL, 137.8 mmol) at room temperature. The reaction mixture was stirred for 5 min. Acetyl chloride (13.0 g, 54.28 mmol) was then added in DCM drop by drop at 0 °C. The reaction mixture was stirred at room temperature for another 30 min. The resulting reaction solution was washed with HCl (1 N) and concentrated under vacuum. The crude solid product was washed with Et<sub>2</sub>O to give **42** (12 g, 84%) as a white solid. <sup>1</sup>H NMR (500 MHz, CDCl<sub>3</sub>, δ): 6.99 (s, 1H), 6.84 (s, 2H), 4.80 (s, 2H), 3.77 (s, 3H), 3.25 (s, 3H).

#### Weinreb amide method B2.

**2-(3,5-Dichlorophenoxy)-*N*-methoxy-*N*-methylacetamide (42).** To a solution of phenol (5.27 g, 32.33 mmol) in EtOH (10 mL) was added NaOEt (21 wt% in EtOH, 12.1 mL, 32.41 mmol) at room temperature. The reaction mixture was stirred for 10 min. Compound **39** (5.87 g, 32.25 mmol) was then gently added at room temperature. After the resulting solution was stirred at 70 °C overnight, the reaction mixture was cooled, poured into HCl (0.25 M), and the aqueous layer was extracted with EtOAc. The

combined organic layer was concentrated in vacuo and reconstituted in CHCl<sub>3</sub>. The precipitate was filtered and washed with CHCl<sub>3</sub>. Wienreb amide **42** (4.53 g, 53%) was obtained as a white solid.

**2-(3,5-Difluorophenoxy)-*N*-methoxy-*N*-methylacetamide (43).** Analogous to **42**, compound **43** was prepared via method B2. 3,5-Difluorophenol (1.00 g, 7.69 mmol) was treated with NaOEt (21 wt% in EtOH, 2.90 mL, 7.69 mmol) and **36** (1.40 g, 7.69 mmol). Further purification by flash chromatography (ethyl acetate/hexanes = 1/2) was applied to give **43** (1.24 g, 70%) as a white solid. <sup>1</sup>H NMR (500 MHz, CDCl<sub>3</sub>, δ): 6.49-6.42 (m, 3H), 4.81 (s, 2H), 3.77 (s, 3H), 3.24 (s, 3H).

**2-(3,5-Dibromophenoxy)-*N*-methoxy-*N*-methylacetamide (44).** Analogous to **42**, **44** was prepared via method B2. 3,5-Dibromophenol (1.00 g, 3.97 mmol) was treated with NaOEt (21 wt% in EtOH, 1.50 mL, 4.01 mmol) and **36** (0.72 g, 3.96 mmol). Further purification by flash chromatography (ethyl acetate/hexanes = 1/2) was applied to give **44** (1.07 g, 76%) as a white solid. <sup>1</sup>H NMR (500 MHz, CDCl<sub>3</sub>, δ): 7.28 (s, 1H), 7.04 (s, 2H), 4.80 (s, 2H), 3.77 (s, 3H), 3.25 (s, 3H).

**2-(3-Bromophenoxy)-*N*-methoxy-*N*-methylacetamide (45).** Analogous to **42**, compound **45** was prepared via method B2. 3-Bromophenol (2.50 g, 14.5 mmol) was treated with NaOEt (21 wt% in EtOH, 5.40 mL, 14.5 mmol) and **36** (2.66 g, 14.6 mmol). Further purification by flash chromatography (ethyl acetate/hexanes = 1/2) was applied to give **45** (1.07 g, 61%) as a white solid. <sup>1</sup>H NMR (500 MHz, CDCl<sub>3</sub>, δ): 7.16-7.09 (m, 3H), 6.90-6.88 (m, 1H), 4.80 (s, 2H), 3.76 (s, 3H), 3.24 (s, 3H).

**2-(Biphenyl-3-yloxy)-*N*-methoxy-*N*-methylacetamide (46).** Analogous to **42**, compound **46** was prepared via method B2. Biphenyl-3-ol (1.02 g, 5.96 mmol) was treated with NaOEt (21 wt% in EtOH, 2.22 mL, 5.95 mmol) and **36** (1.08 g, 5.93 mmol). Further purification by flash chromatography (ethyl acetate/hexanes = 1/2) was applied to give **46** (0.95 g, 59%) as a white solid. <sup>1</sup>H NMR (500 MHz, CDCl<sub>3</sub>, δ): 7.57 (d, *J* = 7.2 Hz, 2H), 7.42 (t, *J* = 7.6 Hz, 2H), 7.60-7.32 (m, 2H), 7.20 (s, 1H), 7.15-7.09 (m, 1H), 6.93-6.91 (m, 1H), 4.88 (s, 2H), 3.77 (s, 3H), 3.24 (s, 3H).

**2-(5-Phenylbiphenyl-3-yloxy)-*N*-methoxy-*N*-methylacetamide (47).** Analogous to **42**, **47** was prepared via method B2. 5-Phenylbiphenyl-3-ol (0.81 g, 3.29 mmol) was treated with NaOEt (21 wt% in EtOH, 1.25 mL, 3.35 mmol) and **36** (0.60 g, 3.30 mmol). Further purification by flash chromatography (ethyl acetate/hexanes = 1/2) was applied to give **47** (0.71 g, 62%) as a white solid. <sup>1</sup>H NMR (500 MHz, CDCl<sub>3</sub>, δ): 7.63 (d, *J* = 7.2 Hz, 4H), 7.46-7.43 (m, 5H), 7.38-7.35 (m, 2H), 7.17 (s, 2H), 4.92 (s, 2H), 3.77 (s, 3H), 3.25 (s, 3H).

#### HPLC data and spectra for 1-19.

##### 5-((4-Chlorophenylthio)methyl)-1*H*-pyrazol-3(2*H*)-one (1)

HPLC method A (isocratic; MeCN:H<sub>2</sub>O 30:70, 60 min; 0.1% TFA): r.t. = 12.42 min, purity = 97.1%.

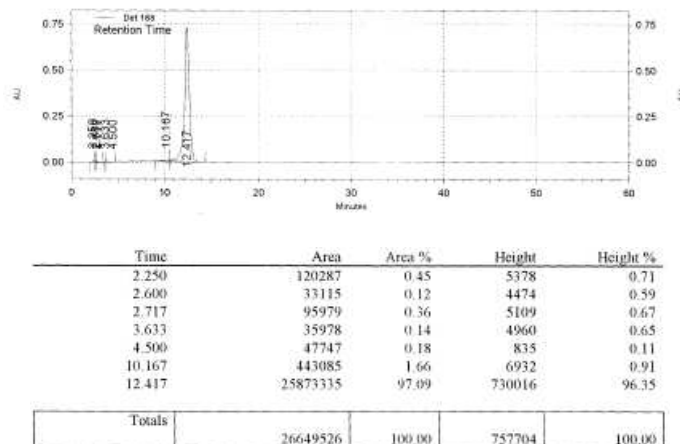

HPLC method B (isocratic; MeOH:H<sub>2</sub>O 50:50, 60 min; 0.1% TFA): r.t. = 20.67 min, purity = 97.0%.

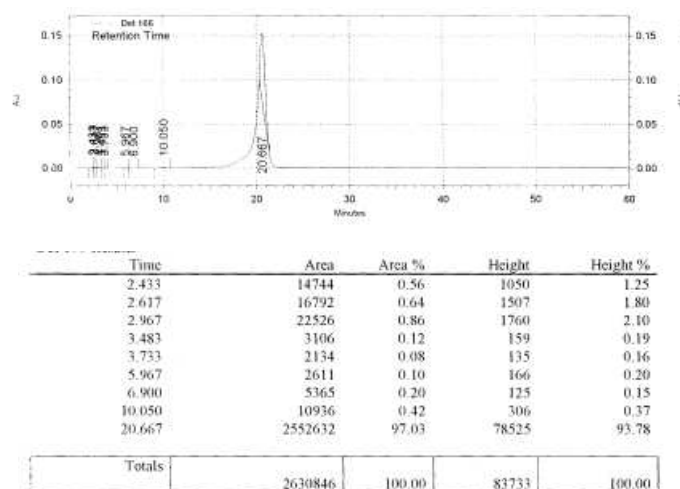

### 5-((3,5-Dichlorophenylthio)methyl)-1*H*-pyrazol-3(2*H*)-one (2)

HPLC method A (gradient; MeCN:H<sub>2</sub>O 30:70 to 80:20, 0 to 20 min, MeCN:H<sub>2</sub>O 80:20 to 30:70, 20 to 40 min; 0.1% TFA): r.t. = 10.70 min, purity = 98.4%.

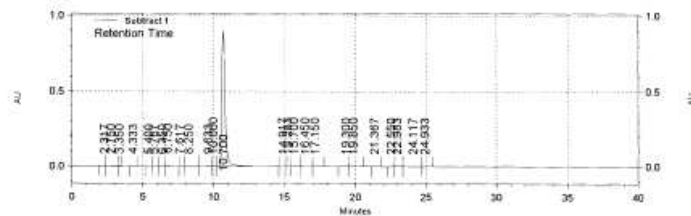

| Time   | Area     | Area % | Height | Height % |
|--------|----------|--------|--------|----------|
| 2.317  | 18196    | 0.12   | 1240   | 0.14     |
| 2.750  | 58929    | 0.38   | 1436   | 0.16     |
| 3.350  | 10407    | 0.07   | 1154   | 0.13     |
| 4.333  | 1392     | 0.01   | 91     | 0.01     |
| 5.400  | 1223     | 0.01   | 89     | 0.01     |
| 5.767  | 1211     | 0.01   | 73     | 0.01     |
| 6.350  | 1913     | 0.01   | 134    | 0.01     |
| 6.750  | 58347    | 0.38   | 3603   | 0.39     |
| 7.617  | 1837     | 0.01   | 114    | 0.01     |
| 8.250  | 5551     | 0.04   | 212    | 0.02     |
| 9.633  | 28622    | 0.19   | 1900   | 0.21     |
| 10.000 | 5746     | 0.04   | 339    | 0.04     |
| 10.700 | 15206319 | 58.36  | 901686 | 98.59    |
|        |          |        |        |          |
| 14.917 | 10841    | 0.07   | 442    | 0.05     |
| 15.283 | 5354     | 0.03   | 349    | 0.04     |
| 15.700 | 10280    | 0.07   | 511    | 0.06     |
| 16.450 | 6099     | 0.04   | 177    | 0.02     |
| 17.150 | 2585     | 0.02   | 83     | 0.01     |
| 19.300 | 4726     | 0.03   | 215    | 0.02     |
| 19.850 | 7492     | 0.05   | 265    | 0.03     |
| 21.367 | 1359     | 0.01   | 72     | 0.01     |
| 22.550 | 1496     | 0.01   | 79     | 0.01     |
| 22.983 | 2768     | 0.02   | 118    | 0.01     |
| 24.117 | 5017     | 0.03   | 107    | 0.01     |
| 24.933 | 2035     | 0.01   | 85     | 0.01     |
|        |          |        |        |          |
| Totals | 15459745 | 100.00 | 914574 | 100.00   |

HPLC method B (isocratic; MeOH:H<sub>2</sub>O 60:40, 60 min; 0.1% TFA): r.t. = 13.73 min, purity = 97.9%.

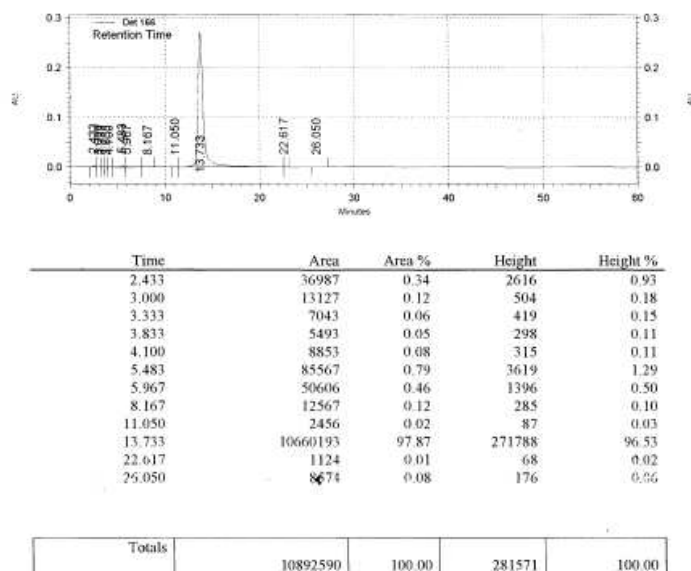

### 5-(4-Chlorophenylthio)-1*H*-pyrazol-3(2*H*)-one-<sup>15</sup>N<sub>2</sub> (3)

HPLC method A (gradient; MeCN:H<sub>2</sub>O 30:70 to 80:20, 0 to 20 min, MeCN:H<sub>2</sub>O 80:20 to 30:70, 20 to 40 min; 0.1% TFA): r.t. = 8.22 min, purity = 97.4%.

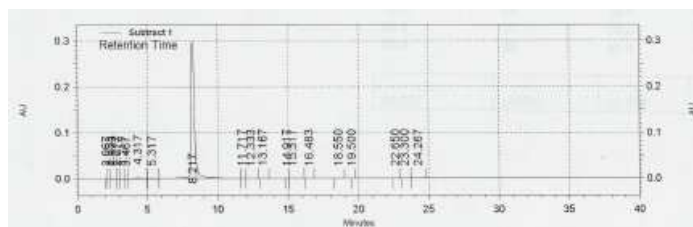

| Time   | Area    | Area % | Height | Height % |
|--------|---------|--------|--------|----------|
| 2.067  | 331     | 0.01   | 113    | 0.04     |
| 2.333  | 3341    | 0.06   | 483    | 0.16     |
| 2.533  | 8362    | 0.16   | 866    | 0.28     |
| 2.817  | 238     | 0.00   | 33     | 0.01     |
| 3.217  | 5866    | 0.07   | 345    | 0.11     |
| 3.467  | 5788    | 0.11   | 660    | 0.22     |
| 4.317  | 75599   | 1.43   | 3776   | 1.24     |
| 5.317  | 20574   | 0.39   | 806    | 0.26     |
| 8.217  | 5139711 | 97.35  | 296840 | 97.31    |
| 11.717 | 1824    | 0.03   | 97     | 0.03     |
| 12.333 | 4295    | 0.08   | 164    | 0.05     |

|        |         |        |        |        |
|--------|---------|--------|--------|--------|
| 13.167 | 4751    | 0.09   | 343    | 0.11   |
| 14.917 | 274     | 0.01   | 32     | 0.01   |
| 15.317 | 3236    | 0.06   | 132    | 0.04   |
| 16.483 | 531     | 0.01   | 32     | 0.01   |
| 18.550 | 2716    | 0.05   | 143    | 0.05   |
| 19.500 | 340     | 0.01   | 24     | 0.01   |
| 22.650 | 430     | 0.01   | 33     | 0.01   |
| 23.300 | 1231    | 0.02   | 71     | 0.02   |
| 24.267 | 2322    | 0.04   | 68     | 0.02   |
| Totals | 5279760 | 100.00 | 305061 | 100.00 |

HPLC method B (isocratic; MeOH:H<sub>2</sub>O 50:50, 60 min; 0.1% TFA): r.t. = 13.45 min, purity = 99.1%.

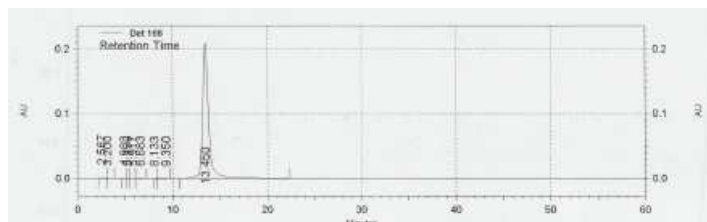

| Time   | Area    | Area % | Height | Height % |
|--------|---------|--------|--------|----------|
| 2.567  | 25518   | 0.28   | 1952   | 0.92     |
| 3.200  | 4279    | 0.05   | 165    | 0.08     |
| 4.983  | 1512    | 0.02   | 96     | 0.05     |
| 5.350  | 1567    | 0.02   | 96     | 0.05     |
| 5.917  | 2814    | 0.03   | 120    | 0.06     |
| 6.683  | 14890   | 0.16   | 585    | 0.27     |
| 8.133  | 4145    | 0.05   | 275    | 0.13     |
| 9.350  | 27452   | 0.30   | 294    | 0.14     |
| 13.450 | 9121841 | 99.11  | 209685 | 98.32    |
| Totals | 9204018 | 100.00 | 213268 | 100.00   |

#### 5-(4-Chlorophenylsulfinyl)-1*H*-pyrazol-3(2*H*)-one (4)

HPLC method A (isocratic; MeCN:H<sub>2</sub>O 25:75, 60 min; 0.1% TFA): r.t. = 6.12 min, purity = 95.3%.

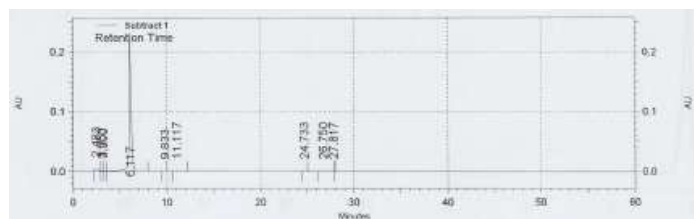

| Time   | Area    | Area % | Height | Height % |
|--------|---------|--------|--------|----------|
| 2.483  | 117168  | 3.14   | 3759   | 1.59     |
| 3.050  | 23295   | 0.62   | 1835   | 0.78     |
| 3.300  | 15131   | 0.40   | 1072   | 0.45     |
| 6.117  | 3562696 | 95.34  | 228415 | 96.91    |
| 9.833  | 605     | 0.02   | 31     | 0.01     |
| 11.117 | 10044   | 0.27   | 379    | 0.16     |
| 24.733 | 975     | 0.03   | 48     | 0.02     |
| 26.750 | 6985    | 0.19   | 142    | 0.06     |
| 27.817 | 126     | 0.00   | 25     | 0.01     |
| Totals | 3737025 | 100.00 | 235706 | 100.00   |

HPLC method B (isocratic; MeOH:H<sub>2</sub>O 30:70, 60 min; 0.1% TFA): r.t. = 17.47 min, purity = 95.6%.

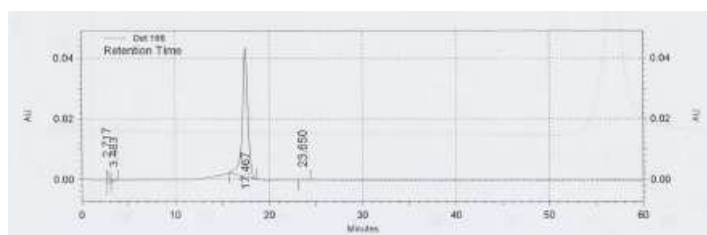

| Time   | Area    | Area % | Height | Height % |
|--------|---------|--------|--------|----------|
| 2.717  | 58740   | 3.37   | 4743   | 9.93     |
| 3.483  | 13569   | 0.78   | 529    | 1.11     |
| 17.467 | 1665946 | 95.63  | 42376  | 88.76    |
| 23.650 | 3736    | 0.21   | 93     | 0.19     |
| Totals | 1741991 | 100.00 | 47741  | 100.00   |

### 5-(4-Chloro-2,5-dimethylphenylsulfinyl)-1*H*-pyrazol-3(2*H*)-one (5)

HPLC method A (gradient; MeCN:H<sub>2</sub>O 30:70 to 80:20, 0 to 20 min, MeCN:H<sub>2</sub>O 80:20 to 30:70, 20 to 40 min; 0.1% TFA): r.t. = 6.85 min, purity = 97.7%.

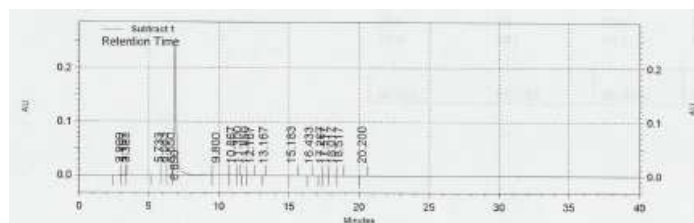

| Time   | Area    | Area % | Height | Height % |
|--------|---------|--------|--------|----------|
| 2.900  | 10943   | 0.39   | 452    | 0.18     |
| 3.167  | 8252    | 0.30   | 819    | 0.32     |
| 3.383  | 1044    | 0.04   | 372    | 0.14     |
| 5.733  | 4220    | 0.15   | 163    | 0.06     |
| 6.083  | 4246    | 0.15   | 174    | 0.07     |
| 6.550  | 7445    | 0.27   | 665    | 0.26     |
| 6.850  | 2712696 | 97.70  | 253091 | 98.36    |
| 9.800  | 11808   | 0.43   | 286    | 0.11     |
| 10.867 | 2238    | 0.08   | 139    | 0.05     |
| 11.300 | 192     | 0.01   | 29     | 0.01     |
| 11.850 | 602     | 0.02   | 66     | 0.03     |



|        |         |        |        |        |
|--------|---------|--------|--------|--------|
| 12.167 | 698     | 0.03   | 57     | 0.02   |
| 13.167 | 190     | 0.01   | 24     | 0.01   |
| 15.183 | 1816    | 0.07   | 139    | 0.05   |
| 16.433 | 301     | 0.01   | 32     | 0.01   |
| 17.267 | 1902    | 0.07   | 201    | 0.08   |
| 17.517 | 2305    | 0.08   | 162    | 0.06   |
| 18.017 | 2332    | 0.08   | 170    | 0.07   |
| 18.517 | 872     | 0.03   | 69     | 0.03   |
| 20.200 | 2393    | 0.09   | 189    | 0.07   |
| Totals |         |        |        |        |
|        | 2776495 | 100.00 | 257299 | 100.00 |

HPLC method B (isocratic; MeOH:H<sub>2</sub>O 50:50, 60 min; 0.1% TFA): r.t. = 11.53 min, purity = 97.4%.

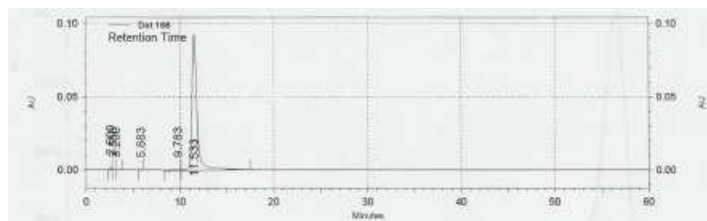

| Time   | Area    | Area % | Height | Height % |
|--------|---------|--------|--------|----------|
| 2.600  | 20962   | 0.59   | 1827   | 1.91     |
| 2.883  | 2901    | 0.08   | 191    | 0.20     |
| 3.200  | 3707    | 0.10   | 129    | 0.13     |
| 5.883  | 1163    | 0.03   | 65     | 0.07     |
| 9.783  | 64945   | 1.82   | 786    | 0.82     |
| 11.533 | 3473602 | 97.37  | 92802  | 96.87    |
|        |         |        |        |          |
| Totals | 3567280 | 100.00 | 95800  | 100.00   |

### 5-(4-Chlorophenylsulfonyl)-1*H*-pyrazol-3(2*H*)-one (6)

HPLC method A (isocratic; MeCN:H<sub>2</sub>O 30:70, 60 min; 0.1% TFA): r.t. = 7.28 min, purity = 98.1%.

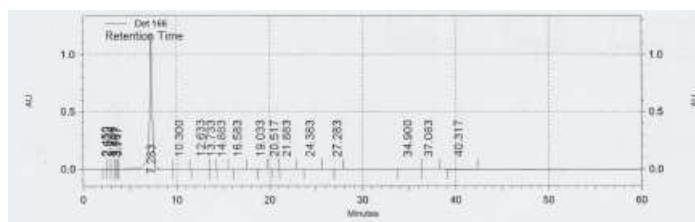

| Time   | Area     | Area % | Height  | Height % |
|--------|----------|--------|---------|----------|
| 2.450  | 95548    | 0.37   | 4963    | 0.41     |
| 2.633  | 53797    | 0.21   | 4336    | 0.36     |
| 3.200  | 59593    | 0.23   | 3611    | 0.30     |
| 3.567  | 28819    | 0.11   | 2205    | 0.18     |
| 3.717  | 26582    | 0.10   | 4113    | 0.34     |
| 7.283  | 25659359 | 98.07  | 1185929 | 97.97    |
| 10.300 | 29154    | 0.11   | 693     | 0.06     |
| 12.633 | 64997    | 0.25   | 2135    | 0.18     |
| 13.733 | 1992     | 0.01   | 84      | 0.01     |
| 14.883 | 2707     | 0.01   | 67      | 0.01     |
| 16.583 | 6590     | 0.03   | 204     | 0.02     |
| 19.033 | 2803     | 0.01   | 59      | 0.00     |
| 20.517 | 1344     | 0.01   | 46      | 0.00     |

|        |          |        |         |        |
|--------|----------|--------|---------|--------|
| 21.883 | 8116     | 0.03   | 207     | 0.02   |
| 24.383 | 17931    | 0.07   | 374     | 0.03   |
| 27.283 | 1327     | 0.01   | 46      | 0.00   |
| 34.900 | 36932    | 0.14   | 557     | 0.05   |
| 37.083 | 9632     | 0.04   | 176     | 0.01   |
| 40.317 | 58926    | 0.23   | 738     | 0.06   |
| <hr/>  |          |        |         |        |
| Totals | 26165349 | 100.00 | 1210543 | 100.00 |

HPLC method B (isocratic; MeOH:H<sub>2</sub>O 40:60, 60 min; 0.1% TFA): r.t. = 11.05 min, purity = 99.3%.

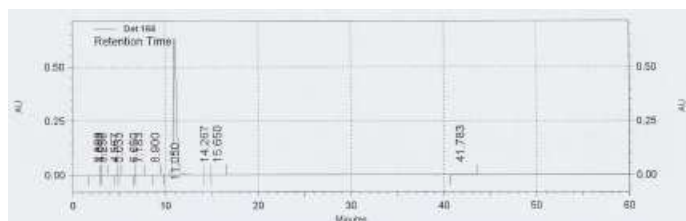

| Time   | Area     | Area % | Height | Height % |
|--------|----------|--------|--------|----------|
| 2.800  | 35743    | 0.24   | 1195   | 0.19     |
| 3.017  | 4437     | 0.03   | 685    | 0.11     |
| 3.250  | 9198     | 0.06   | 561    | 0.09     |
| 4.567  | 615      | 0.00   | 23     | 0.00     |
| 5.033  | 277      | 0.00   | 30     | 0.00     |
| 6.650  | 152      | 0.00   | 20     | 0.00     |
| 7.183  | 1770     | 0.01   | 65     | 0.01     |
| 8.900  | 2664     | 0.02   | 147    | 0.02     |
| 11.050 | 14900471 | 99.26  | 633179 | 99.42    |
| 14.267 | 4921     | 0.03   | 183    | 0.03     |
| 15.650 | 12581    | 0.08   | 276    | 0.04     |
| 41.783 | 39245    | 0.26   | 524    | 0.08     |

|        |          |        |        |        |
|--------|----------|--------|--------|--------|
| Totals | 15012074 | 100.00 | 636888 | 100.00 |
|--------|----------|--------|--------|--------|

### 5-(3,5-Dichlorophenylsulfonyl)-1H-pyrazol-3(2H)-one (7)

HPLC method A (gradient; MeCN:H<sub>2</sub>O 30:70 to 80:20, 0 to 20 min, MeCN:H<sub>2</sub>O 80:20 to 30:70, 20 to 40 min; 0.1% TFA): r.t. = 8.98 min, purity = 95.3%.

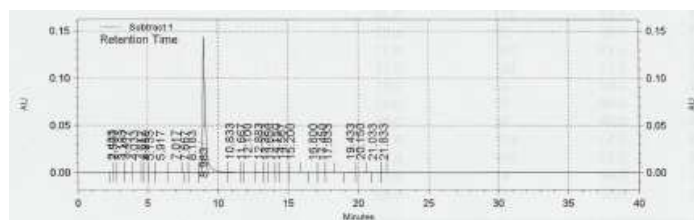

| Time  | Area | Area % | Height | Height % |
|-------|------|--------|--------|----------|
| 2.433 | 2569 | 0.13   | 359    | 0.24     |
| 2.583 | 1556 | 0.08   | 315    | 0.21     |
| 3.183 | 4923 | 0.25   | 274    | 0.18     |
| 3.417 | 8642 | 0.43   | 749    | 0.50     |
| 4.033 | 4968 | 0.25   | 191    | 0.13     |
| 4.617 | 850  | 0.04   | 91     | 0.06     |
| 4.850 | 1124 | 0.06   | 79     | 0.05     |
| 5.133 | 1086 | 0.05   | 53     | 0.04     |
| 5.917 | 1958 | 0.10   | 60     | 0.04     |
| 7.017 | 2851 | 0.14   | 244    | 0.16     |
| 7.667 | 425  | 0.02   | 33     | 0.02     |

|        |         |        |        |        |
|--------|---------|--------|--------|--------|
| 8.183  | 1126    | 0.06   | 55     | 0.04   |
| 8.983  | 1897634 | 95.30  | 143856 | 96.11  |
| 10.833 | 18112   | 0.91   | 829    | 0.55   |
| 11.667 | 1466    | 0.07   | 136    | 0.09   |
| 12.100 | 5673    | 0.28   | 163    | 0.11   |
| 12.883 | 8430    | 0.42   | 523    | 0.35   |
| 13.383 | 2101    | 0.11   | 143    | 0.10   |
| 13.650 | 2935    | 0.15   | 157    | 0.10   |
| 14.150 | 1057    | 0.05   | 72     | 0.05   |
| 14.567 | 3841    | 0.19   | 160    | 0.11   |
| 15.200 | 2596    | 0.13   | 165    | 0.11   |
| 16.800 | 725     | 0.04   | 44     | 0.03   |
| 17.450 | 1529    | 0.08   | 77     | 0.05   |
| 17.833 | 1789    | 0.09   | 84     | 0.06   |
| 19.433 | 6553    | 0.33   | 497    | 0.33   |
| 20.150 | 3268    | 0.16   | 194    | 0.13   |
| 21.033 | 1112    | 0.06   | 41     | 0.03   |
| 21.833 | 360     | 0.02   | 27     | 0.02   |
| Totals | 1991259 | 100.00 | 149671 | 100.00 |

HPLC method B (isocratic; MeOH:H<sub>2</sub>O 50:50, 60 min; 0.1% TFA): r.t. = 11.50 min, purity = 95.8%.

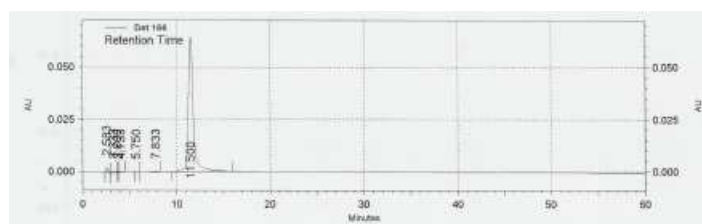

| Time   | Area    | Area % | Height | Height % |
|--------|---------|--------|--------|----------|
| 2.583  | 35291   | 1.48   | 2135   | 3.13     |
| 3.333  | 27398   | 1.15   | 845    | 1.24     |
| 3.800  | 6302    | 0.26   | 455    | 0.67     |
| 4.133  | 7034    | 0.29   | 301    | 0.44     |
| 5.750  | 1205    | 0.05   | 56     | 0.08     |
| 7.833  | 24004   | 1.01   | 406    | 0.60     |
| 11.500 | 2285475 | 95.76  | 63956  | 93.84    |
| Totals | 2386709 | 100.00 | 68154  | 100.00   |

### 5-(4-Chloro-2,5-dimethylphenylsulfonyl)-1*H*-pyrazol-3(2*H*)-one (8)

HPLC method A (gradient; MeCN:H<sub>2</sub>O 30:70 to 80:20, 0 to 20 min, MeCN:H<sub>2</sub>O 80:20 to 30:70, 20 to 40 min; 0.1% TFA): r.t. = 9.40 min, purity = 95.4%.

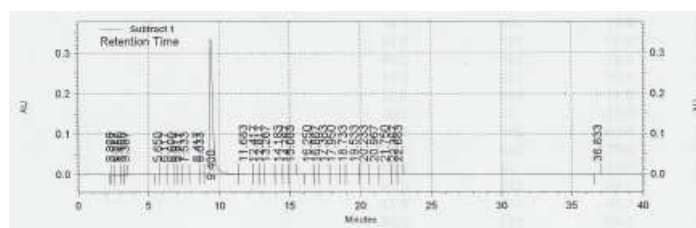

| Time  | Area  | Area % | Height | Height % |
|-------|-------|--------|--------|----------|
| 2.300 | 1797  | 0.04   | 499    | 0.14     |
| 2.517 | 8762  | 0.17   | 1121   | 0.32     |
| 2.850 | 52708 | 1.05   | 2337   | 0.67     |
| 3.150 | 34233 | 0.68   | 2446   | 0.70     |
| 3.367 | 18692 | 0.37   | 2122   | 0.61     |
| 5.650 | 678   | 0.01   | 62     | 0.02     |
| 6.117 | 1645  | 0.03   | 89     | 0.03     |
| 6.600 | 3300  | 0.07   | 166    | 0.05     |
| 6.917 | 1150  | 0.02   | 94     | 0.03     |
| 7.217 | 1477  | 0.03   | 94     | 0.03     |

|        |         |        |        |        |
|--------|---------|--------|--------|--------|
| 7.533  | 2106    | 0.04   | 114    | 0.03   |
| 8.417  | 4949    | 0.10   | 241    | 0.07   |
| 8.633  | 2572    | 0.05   | 163    | 0.05   |
| 9.400  | 4778629 | 95.44  | 335838 | 96.02  |
| 11.683 | 35937   | 0.72   | 1149   | 0.33   |
| 12.417 | 5092    | 0.10   | 231    | 0.07   |
| 12.817 | 3611    | 0.07   | 181    | 0.05   |
| 13.267 | 4383    | 0.09   | 166    | 0.05   |
| 14.183 | 2525    | 0.05   | 128    | 0.04   |
| 14.767 | 3484    | 0.07   | 266    | 0.08   |
| 15.083 | 1882    | 0.04   | 138    | 0.04   |
| 16.250 | 6586    | 0.13   | 434    | 0.12   |
| 16.867 | 600     | 0.01   | 60     | 0.02   |
| 17.383 | 4265    | 0.09   | 264    | 0.08   |
| 17.950 | 3267    | 0.07   | 242    | 0.07   |
| 18.733 | 419     | 0.01   | 34     | 0.01   |
| 19.533 | 3227    | 0.06   | 126    | 0.04   |
| 20.233 | 8021    | 0.16   | 471    | 0.13   |
| 20.967 | 4348    | 0.09   | 153    | 0.04   |
| 21.750 | 3916    | 0.08   | 159    | 0.05   |
| 22.367 | 1185    | 0.02   | 62     | 0.02   |
| 22.683 | 743     | 0.01   | 47     | 0.01   |
| 36.833 | 674     | 0.01   | 44     | 0.01   |
| Totals | 5006863 | 100.00 | 349741 | 100.00 |

HPLC method B (isocratic; MeOH:H<sub>2</sub>O 50:50, 60 min; 0.1% TFA): r.t. = 14.93 min, purity = 98.9%.

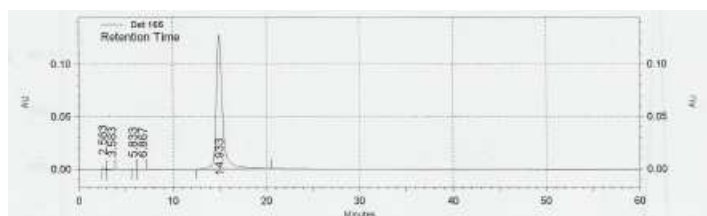

| Time   | Area    | Area % | Height | Height % |
|--------|---------|--------|--------|----------|
| 2.583  | 37769   | 0.62   | 2220   | 1.69     |
| 3.583  | 23905   | 0.39   | 415    | 0.32     |
| 5.833  | 977     | 0.02   | 53     | 0.04     |
| 6.867  | 1960    | 0.03   | 62     | 0.05     |
| 14.933 | 6017625 | 98.94  | 128374 | 97.90    |
| Totals | 6082236 | 100.00 | 131124 | 100.00   |

### 5-((4-Chlorophenoxy)methyl)-1H-pyrazol-3(2H)-one (9)

HPLC method A (gradient; MeCN:H<sub>2</sub>O 30:70 to 80:20, 0 to 20 min, MeCN:H<sub>2</sub>O 80:20 to 30:70, 20 to 40 min; 0.1% TFA): r.t. = 8.17 min, purity = 98.2%.

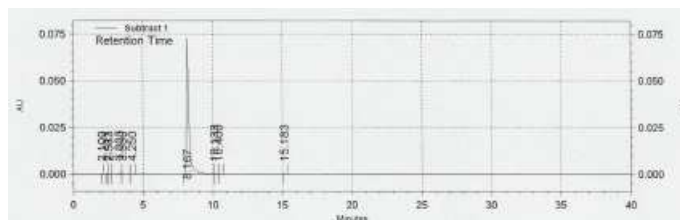

| Time   | Area   | Area % | Height | Height % |
|--------|--------|--------|--------|----------|
| 2.100  | 1207   | 0.13   | 178    | 0.24     |
| 2.417  | 2468   | 0.27   | 341    | 0.46     |
| 2.583  | 1061   | 0.11   | 210    | 0.28     |
| 3.333  | 7733   | 0.84   | 612    | 0.82     |
| 3.550  | 2200   | 0.24   | 109    | 0.15     |
| 4.250  | 479    | 0.05   | 40     | 0.05     |
| 8.167  | 906120 | 98.19  | 72854  | 97.80    |
| 10.133 | 835    | 0.09   | 62     | 0.08     |
| 10.400 | 327    | 0.04   | 39     | 0.05     |
| 15.183 | 387    | 0.04   | 46     | 0.06     |

|        |        |        |       |        |
|--------|--------|--------|-------|--------|
| Totals | 922817 | 100.00 | 74491 | 100.00 |
|--------|--------|--------|-------|--------|

HPLC method B (isocratic; MeOH:H<sub>2</sub>O 50:50, 60 min; 0.1% TFA): r.t. = 11.80 min, purity = 97.4%.

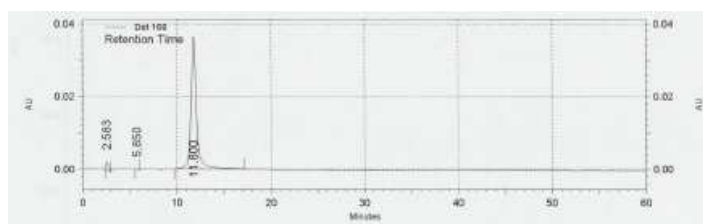

| Time   | Area    | Area % | Height | Height % |
|--------|---------|--------|--------|----------|
| 2.583  | 39066   | 2.51   | 2264   | 5.82     |
| 5.850  | 1385    | 0.09   | 82     | 0.21     |
| 11.800 | 1515620 | 97.40  | 36531  | 93.97    |
| Totals | 1556071 | 100.00 | 38877  | 100.00   |

### 5-((4-Ethylphenoxy)methyl)-1*H*-pyrazol-3(2*H*)-one (10)

HPLC method A (gradient; MeCN:H<sub>2</sub>O 30:70 to 80:20, 0 to 20 min, MeCN:H<sub>2</sub>O 80:20 to 30:70, 20 to 40 min; 0.1% TFA): r.t. = 9.03 min, purity = 95.3%.

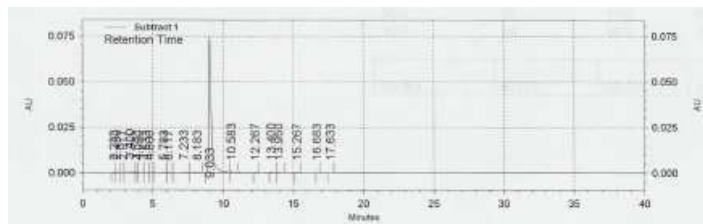

| Time  | Area  | Area % | Height | Height % |
|-------|-------|--------|--------|----------|
| 2.233 | 2163  | 0.22   | 204    | 0.26     |
| 2.450 | 3452  | 0.35   | 365    | 0.47     |
| 2.917 | 682   | 0.07   | 67     | 0.09     |
| 3.400 | 11650 | 1.19   | 686    | 0.89     |
| 3.833 | 1448  | 0.15   | 131    | 0.17     |
| 4.050 | 2287  | 0.23   | 124    | 0.16     |
| 4.533 | 1416  | 0.14   | 80     | 0.10     |
| 4.800 | 695   | 0.07   | 52     | 0.07     |
| 5.783 | 3216  | 0.33   | 133    | 0.17     |
| 6.117 | 1886  | 0.19   | 110    | 0.14     |
| 7.233 | 4989  | 0.51   | 244    | 0.32     |

|        |        |        |       |        |
|--------|--------|--------|-------|--------|
| 8.183  | 2681   | 0.27   | 93    | 0.12   |
| 9.033  | 931801 | 95.33  | 74386 | 96.13  |
| 10.583 | 3339   | 0.34   | 245   | 0.32   |
| 12.267 | 889    | 0.09   | 81    | 0.10   |
| 13.400 | 1714   | 0.18   | 160   | 0.21   |
| 13.950 | 816    | 0.08   | 47    | 0.06   |
| 15.267 | 1282   | 0.13   | 95    | 0.12   |
| 16.683 | 399    | 0.04   | 29    | 0.04   |
| 17.633 | 606    | 0.06   | 46    | 0.06   |
| Totals |        |        |       |        |
|        | 977411 | 100.00 | 77378 | 100.00 |

HPLC method B (isocratic; MeOH:H<sub>2</sub>O 50:50, 60 min; 0.1% TFA): r.t. = 15.50 min, purity = 96.5%.

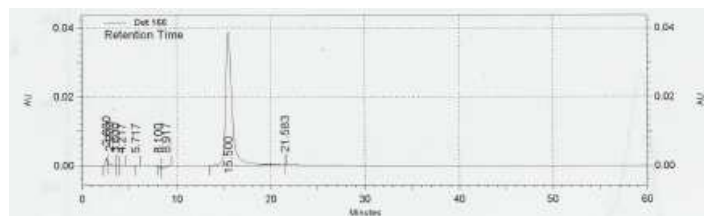

| Time   | Area    | Area % | Height | Height % |
|--------|---------|--------|--------|----------|
| 2.600  | 25072   | 1.31   | 2115   | 4.98     |
| 2.933  | 12469   | 0.65   | 586    | 1.38     |
| 3.600  | 1535    | 0.08   | 92     | 0.22     |
| 4.217  | 1131    | 0.06   | 52     | 0.12     |
| 5.717  | 1596    | 0.08   | 59     | 0.14     |
| 8.100  | 3968    | 0.21   | 290    | 0.68     |
| 8.917  | 20965   | 1.09   | 510    | 1.20     |
| 15.500 | 1854074 | 96.52  | 38704  | 91.22    |
| 21.583 | 132     | 0.01   | 23     | 0.05     |
| Totals |         |        |        |          |
|        | 1920942 | 100.00 | 42431  | 100.00   |

### 5-((3-Ethylphenoxy)methyl)-1*H*-pyrazol-3(2*H*)-one (11)

HPLC method A (gradient; MeCN:H<sub>2</sub>O 30:70 to 80:20, 0 to 20 min; MeCN:H<sub>2</sub>O 80:20 to 30:70, 20 to 40 min; 0.1% TFA): r.t. = 8.87 min, purity = 95.0%.

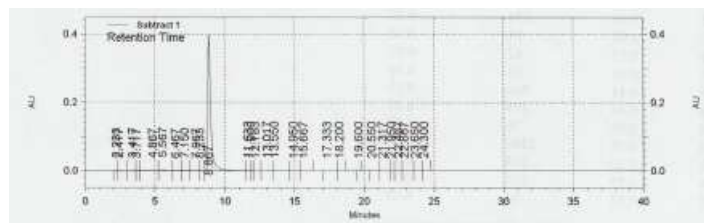

| Time  | Area  | Area % | Height | Height % |
|-------|-------|--------|--------|----------|
| 2.233 | 9615  | 0.16   | 1021   | 0.25     |
| 2.417 | 9086  | 0.15   | 797    | 0.19     |
| 3.417 | 14417 | 0.25   | 1104   | 0.27     |
| 3.717 | 3772  | 0.06   | 239    | 0.06     |
| 4.867 | 22268 | 0.38   | 686    | 0.16     |
| 5.567 | 47078 | 0.80   | 3088   | 0.74     |
| 6.467 | 7156  | 0.12   | 250    | 0.06     |
| 7.150 | 13959 | 0.24   | 878    | 0.21     |
| 7.967 | 15885 | 0.27   | 433    | 0.10     |
| 8.233 | 5872  | 0.10   | 414    | 0.10     |

|        |         |        |        |        |
|--------|---------|--------|--------|--------|
| 8.867  | 5570714 | 94.96  | 398367 | 95.78  |
| 11.633 | 12897   | 0.22   | 836    | 0.20   |
| 11.900 | 4392    | 0.07   | 426    | 0.10   |
| 12.183 | 11473   | 0.20   | 513    | 0.12   |
| 13.017 | 20812   | 0.35   | 1147   | 0.28   |
| 13.550 | 28846   | 0.49   | 1708   | 0.41   |
| 14.950 | 8217    | 0.14   | 456    | 0.11   |
| 15.667 | 5082    | 0.09   | 271    | 0.07   |
| 17.333 | 2663    | 0.05   | 94     | 0.02   |
| 18.200 | 1589    | 0.03   | 87     | 0.02   |
| 19.600 | 493     | 0.01   | 49     | 0.01   |
| 20.550 | 8199    | 0.14   | 560    | 0.13   |
| 21.317 | 8456    | 0.14   | 479    | 0.12   |
| 21.950 | 1190    | 0.02   | 70     | 0.02   |
| 22.467 | 16574   | 0.28   | 1140   | 0.27   |
| 22.867 | 11821   | 0.20   | 614    | 0.15   |
| 23.650 | 2676    | 0.05   | 134    | 0.03   |
| 24.300 | 1407    | 0.02   | 74     | 0.02   |
| Totals | 5866609 | 100.00 | 415935 | 100.00 |

HPLC method B (isocratic; MeOH:H<sub>2</sub>O 50:50, 60 min; 0.1% TFA): r.t. = 15.02 min, purity = 98.3%.

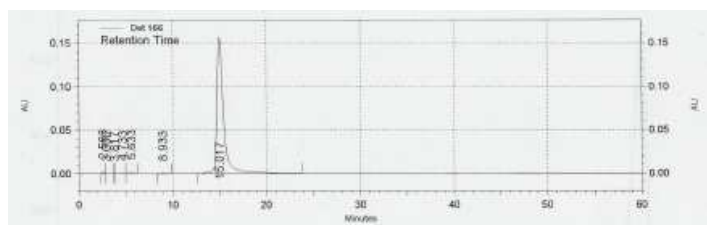

| Time   | Area    | Area % | Height | Height % |
|--------|---------|--------|--------|----------|
| 2.583  | 32599   | 0.40   | 2571   | 1.58     |
| 3.000  | 5762    | 0.07   | 155    | 0.10     |
| 3.817  | 1241    | 0.02   | 106    | 0.07     |
| 4.733  | 17352   | 0.21   | 628    | 0.39     |
| 5.633  | 52002   | 0.64   | 2181   | 1.34     |
| 8.933  | 31930   | 0.39   | 738    | 0.45     |
| 15.017 | 7946935 | 98.26  | 156334 | 96.08    |
| Totals | 8087821 | 100.00 | 162713 | 100.00   |

### 5-((3-*tert*-Butylphenoxy)methyl)-1*H*-pyrazol-3(2*H*)-one (12)

HPLC method A (gradient; MeCN:H<sub>2</sub>O 30:70 to 80:20, 0 to 20 min, MeCN:H<sub>2</sub>O 80:20 to 30:70, 20 to 40 min; 0.1% TFA): r.t. = 11.43 min, purity = 95.7%.

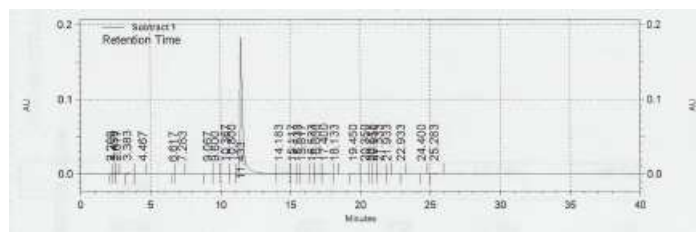

| Time   | Area  | Area % | Height | Height % |
|--------|-------|--------|--------|----------|
| 2.200  | 2273  | 0.09   | 375    | 0.20     |
| 2.450  | 8775  | 0.34   | 959    | 0.50     |
| 2.617  | 10812 | 0.42   | 1563   | 0.82     |
| 3.383  | 23732 | 0.91   | 1485   | 0.78     |
| 4.467  | 7763  | 0.30   | 187    | 0.10     |
| 6.617  | 169   | 0.01   | 23     | 0.01     |
| 7.283  | 512   | 0.02   | 23     | 0.01     |
| 9.067  | 929   | 0.04   | 47     | 0.02     |
| 9.600  | 812   | 0.03   | 54     | 0.03     |
| 10.367 | 1964  | 0.08   | 117    | 0.06     |
| 10.800 | 1055  | 0.04   | 64     | 0.03     |



|        |         |        |        |        |
|--------|---------|--------|--------|--------|
| 11.433 | 2492549 | 95.73  | 183270 | 95.88  |
| 14.183 | 11322   | 0.43   | 389    | 0.20   |
| 15.117 | 4440    | 0.17   | 219    | 0.11   |
| 15.533 | 1543    | 0.06   | 115    | 0.06   |
| 15.817 | 3276    | 0.13   | 123    | 0.06   |
| 16.533 | 1303    | 0.05   | 90     | 0.05   |
| 16.850 | 4563    | 0.18   | 315    | 0.16   |
| 17.400 | 8664    | 0.33   | 631    | 0.33   |
| 18.133 | 365     | 0.01   | 33     | 0.02   |
| 19.450 | 2410    | 0.09   | 186    | 0.10   |
| 20.350 | 2217    | 0.09   | 158    | 0.08   |
| 20.717 | 695     | 0.03   | 57     | 0.03   |
| 20.950 | 936     | 0.04   | 63     | 0.03   |
| 21.333 | 1641    | 0.06   | 92     | 0.05   |
| 21.933 | 346     | 0.01   | 34     | 0.02   |
| 22.933 | 847     | 0.03   | 61     | 0.03   |
| 24.400 | 495     | 0.02   | 36     | 0.02   |
| 25.283 | 7222    | 0.28   | 377    | 0.20   |
| Totals | 2603630 | 100.00 | 191146 | 100.00 |

HPLC method B (isocratic; MeOH:H<sub>2</sub>O 60:40, 60 min; 0.1% TFA): r.t. = 13.37 min, purity = 98.3%.

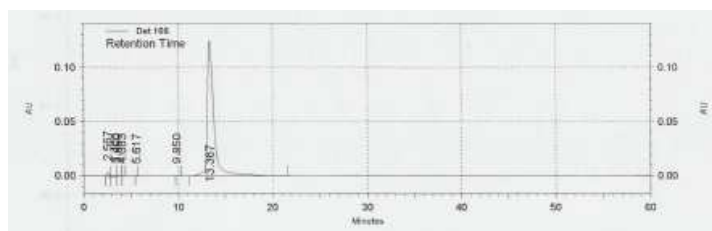

| Time   | Area    | Area % | Height | Height % |
|--------|---------|--------|--------|----------|
| 2.567  | 54473   | 0.92   | 3050   | 2.36     |
| 3.400  | 25697   | 0.43   | 713    | 0.55     |
| 3.650  | 13800   | 0.23   | 523    | 0.40     |
| 4.083  | 2562    | 0.04   | 231    | 0.18     |
| 5.617  | 1304    | 0.02   | 137    | 0.11     |
| 9.850  | 964     | 0.02   | 50     | 0.04     |
| 13.367 | 5823516 | 98.33  | 124592 | 96.36    |
| Totals | 5922316 | 100.00 | 129296 | 100.00   |

### 5-((3,5-Dichlorophenoxy)methyl)-1*H*-pyrazol-3(2*H*)-one (13)

HPLC method A (isocratic; MeCN:H<sub>2</sub>O 40:60, 60 min; 0.1% TFA): r.t. = 9.20 min, purity = 97.7%.

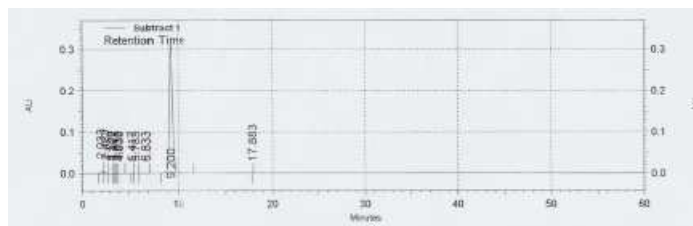

| Time   | Area    | Area % | Height | Height % |
|--------|---------|--------|--------|----------|
| 2.033  | 87837   | 1.19   | 5721   | 1.68     |
| 2.483  | 54482   | 0.74   | 3655   | 1.07     |
| 3.100  | 6197    | 0.08   | 332    | 0.10     |
| 3.367  | 5209    | 0.07   | 332    | 0.10     |
| 3.617  | 1841    | 0.02   | 289    | 0.08     |
| 3.850  | 4402    | 0.06   | 506    | 0.15     |
| 4.033  | 3430    | 0.05   | 161    | 0.05     |
| 5.417  | 676     | 0.01   | 69     | 0.02     |
| 5.783  | 1838    | 0.02   | 88     | 0.03     |
| 6.833  | 3723    | 0.05   | 71     | 0.02     |
| 9.200  | 7198243 | 97.70  | 329030 | 96.69    |
| 17.883 | 105     | 0.00   | 26     | 0.01     |



|         |        |        |        |
|---------|--------|--------|--------|
| 7367983 | 100.00 | 340280 | 100.00 |
|---------|--------|--------|--------|

HPLC method B (isocratic; MeOH:H<sub>2</sub>O 65:35, 60 min; 0.1% TFA): r.t. = 8.78 min, purity = 98.2%.

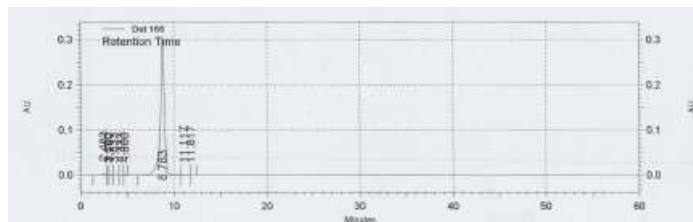

| Time   | Area    | Area % | Height | Height % |
|--------|---------|--------|--------|----------|
| 2.483  | 70871   | 0.78   | 3574   | 1.16     |
| 3.000  | 7351    | 0.08   | 771    | 0.25     |
| 3.150  | 15928   | 0.17   | 758    | 0.25     |
| 3.633  | 22167   | 0.24   | 590    | 0.19     |
| 4.333  | 20057   | 0.22   | 687    | 0.22     |
| 4.800  | 15561   | 0.17   | 751    | 0.24     |
| 8.783  | 8958239 | 98.17  | 301622 | 97.55    |
| 11.117 | 13868   | 0.15   | 389    | 0.13     |
| 11.817 | 1306    | 0.01   | 67     | 0.02     |
| Totals | 9125348 | 100.00 | 309209 | 100.00   |

#### 5-((3,5-Bis(trifluoromethyl)phenoxy)methyl)-1*H*-pyrazol-3(2*H*)-one (14)

HPLC method A (gradient; MeCN:H<sub>2</sub>O 30:70 to 80:20, 0 to 20 min, MeCN:H<sub>2</sub>O 80:20 to 30:70, 20 to 40 min; 0.1% TFA): r.t. = 12.70 min, purity = 96.0%.

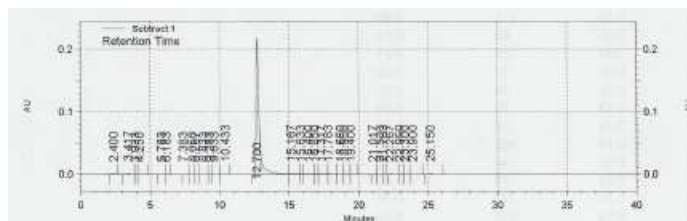

| Time  | Area  | Area % | Height | Height % |
|-------|-------|--------|--------|----------|
| 2.400 | 12985 | 0.39   | 665    | 0.30     |
| 3.417 | 25081 | 0.76   | 1707   | 0.76     |
| 3.933 | 3000  | 0.09   | 250    | 0.11     |
| 4.250 | 4973  | 0.15   | 169    | 0.08     |
| 5.783 | 1578  | 0.05   | 70     | 0.03     |
| 6.183 | 707   | 0.02   | 66     | 0.03     |
| 7.383 | 726   | 0.02   | 43     | 0.02     |
| 8.050 | 915   | 0.03   | 71     | 0.03     |
| 8.267 | 486   | 0.01   | 46     | 0.02     |
| 8.833 | 2283  | 0.07   | 159    | 0.07     |
| 9.283 | 457   | 0.01   | 49     | 0.02     |
| 9.633 | 731   | 0.02   | 44     | 0.02     |

|        |         |        |        |        |
|--------|---------|--------|--------|--------|
| 10.433 | 1181    | 0.04   | 59     | 0.03   |
| 12.700 | 3158490 | 96.00  | 217534 | 96.83  |
| 15.167 | 22073   | 0.67   | 1088   | 0.48   |
| 15.833 | 2858    | 0.09   | 220    | 0.10   |
| 16.400 | 9646    | 0.29   | 240    | 0.11   |
| 16.850 | 2592    | 0.08   | 178    | 0.08   |
| 17.317 | 8153    | 0.25   | 350    | 0.16   |
| 17.783 | 3308    | 0.10   | 133    | 0.06   |
| 18.650 | 1856    | 0.06   | 95     | 0.04   |
| 18.950 | 1831    | 0.06   | 75     | 0.03   |
| 19.400 | 917     | 0.03   | 53     | 0.02   |
| 21.017 | 845     | 0.03   | 78     | 0.03   |
| 21.533 | 872     | 0.03   | 57     | 0.03   |
| 21.783 | 251     | 0.01   | 29     | 0.01   |
| 22.267 | 5474    | 0.17   | 368    | 0.16   |
| 22.950 | 673     | 0.02   | 46     | 0.02   |
| 23.300 | 584     | 0.02   | 39     | 0.02   |
| 23.900 | 3323    | 0.10   | 137    | 0.06   |
| 25.150 | 11226   | 0.34   | 537    | 0.24   |
| Totals | 3290075 | 100.00 | 224655 | 100.00 |

HPLC method B (isocratic; MeOH:H<sub>2</sub>O 60:40, 60 min; 0.1% TFA): r.t. = 19.37 min, purity = 96.6%.

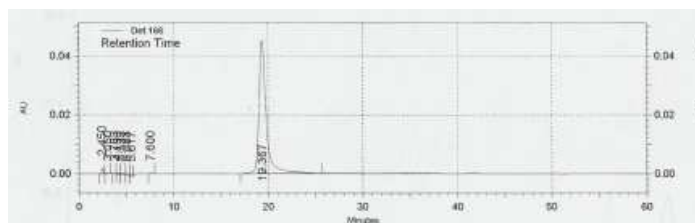

| Time   | Area    | Area % | Height | Height % |
|--------|---------|--------|--------|----------|
| 2.450  | 23581   | 0.93   | 1991   | 4.00     |
| 3.050  | 5797    | 0.23   | 233    | 0.47     |
| 3.783  | 3488    | 0.14   | 172    | 0.35     |
| 4.133  | 7626    | 0.30   | 303    | 0.61     |
| 4.533  | 15520   | 0.61   | 414    | 0.83     |
| 5.083  | 15867   | 0.63   | 602    | 1.21     |
| 5.617  | 11722   | 0.46   | 700    | 1.41     |
| 7.600  | 2182    | 0.09   | 116    | 0.23     |
| 19.367 | 2449268 | 96.62  | 45286  | 90.90    |
| Totals | 2535051 | 100.00 | 49817  | 100.00   |

### 5-((3,5-Difluorophenoxy)methyl)-1*H*-pyrazol-3(2*H*)-one (15)

HPLC method A (gradient; MeCN:H<sub>2</sub>O 30:70 to 80:20, 0 to 20 min, MeCN:H<sub>2</sub>O 80:20 to 30:70, 20 to 40 min; 0.1% TFA): r.t. = 8.03 min, purity = 95.1%.

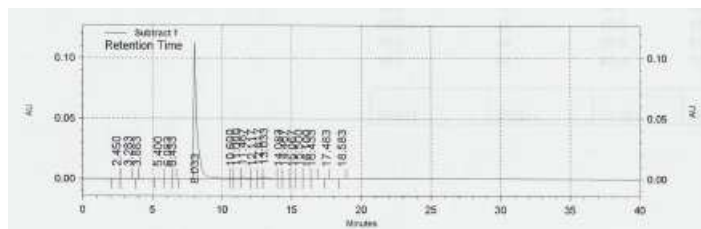

| Time   | Area    | Area % | Height | Height % |
|--------|---------|--------|--------|----------|
| 2.450  | 2881    | 0.15   | 213    | 0.18     |
| 3.283  | 5973    | 0.31   | 293    | 0.25     |
| 3.883  | 98      | 0.01   | 23     | 0.02     |
| 5.400  | 1091    | 0.06   | 52     | 0.04     |
| 6.083  | 1519    | 0.08   | 84     | 0.07     |
| 6.433  | 339     | 0.02   | 46     | 0.04     |
| 8.033  | 1859218 | 95.12  | 112677 | 95.22    |
| 10.600 | 2714    | 0.14   | 228    | 0.19     |
| 11.000 | 9142    | 0.47   | 388    | 0.33     |
| 11.467 | 17702   | 0.91   | 970    | 0.82     |
| 12.117 | 3555    | 0.18   | 212    | 0.18     |

|        |         |        |        |        |
|--------|---------|--------|--------|--------|
| 12.617 | 13814   | 0.71   | 1029   | 0.87   |
| 13.033 | 26683   | 1.37   | 1512   | 1.28   |
| 14.083 | 1673    | 0.09   | 105    | 0.09   |
| 14.467 | 3035    | 0.16   | 166    | 0.14   |
| 15.067 | 1093    | 0.06   | 60     | 0.05   |
| 15.500 | 1816    | 0.09   | 114    | 0.10   |
| 16.100 | 914     | 0.05   | 57     | 0.05   |
| 16.433 | 284     | 0.01   | 21     | 0.02   |
| 17.483 | 435     | 0.02   | 44     | 0.04   |
| 18.583 | 725     | 0.04   | 42     | 0.04   |
| Totals | 1954704 | 100.00 | 118336 | 100.00 |

HPLC method B (isocratic; MeOH:H<sub>2</sub>O 50:50, 60 min; 0.1% TFA): r.t. = 9.87 min, purity = 96.8%.

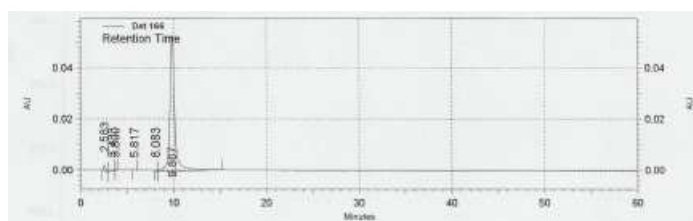

| Time   | Area    | Area % | Height | Height % |
|--------|---------|--------|--------|----------|
| 2.583  | 36859   | 1.86   | 2487   | 4.41     |
| 3.433  | 20549   | 1.03   | 491    | 0.87     |
| 3.800  | 1511    | 0.08   | 184    | 0.33     |
| 5.817  | 1531    | 0.08   | 78     | 0.14     |
| 8.083  | 2744    | 0.14   | 214    | 0.38     |
| 9.867  | 1922320 | 96.82  | 52905  | 93.87    |
| Totals | 1985514 | 100.00 | 56359  | 100.00   |

### 5-((3,5-Dibromophenoxy)methyl)-1*H*-pyrazol-3(2*H*)-one (16)

HPLC method A (isocratic; MeCN:H<sub>2</sub>O 40:60, 60 min; 0.1% TFA): r.t. = 11.35 min, purity = 96.2%.

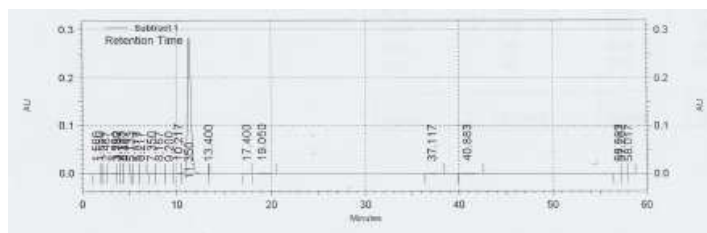

| Time  | Area  | Area % | Height | Height % |
|-------|-------|--------|--------|----------|
| 1.500 | 11717 | 0.16   | 327    | 0.11     |
| 1.850 | 7874  | 0.11   | 810    | 0.28     |
| 2.467 | 13036 | 0.18   | 888    | 0.30     |
| 3.550 | 43079 | 0.61   | 832    | 0.28     |
| 3.767 | 12180 | 0.17   | 1037   | 0.35     |
| 4.133 | 5155  | 0.07   | 301    | 0.10     |
| 4.467 | 4987  | 0.07   | 244    | 0.08     |
| 5.133 | 335   | 0.00   | 31     | 0.01     |
| 5.817 | 2915  | 0.04   | 160    | 0.05     |
| 6.217 | 3285  | 0.05   | 192    | 0.07     |
| 7.350 | 11438 | 0.16   | 691    | 0.23     |
| 8.167 | 9807  | 0.14   | 491    | 0.17     |
| 9.200 | 1666  | 0.02   | 77     | 0.03     |

|        |         |        |        |        |
|--------|---------|--------|--------|--------|
| 10.217 | 41180   | 0.58   | 1896   | 0.64   |
| 11.350 | 6840735 | 96.24  | 284415 | 96.62  |
| 13.400 | 114     | 0.00   | 30     | 0.01   |
| 17.400 | 5416    | 0.08   | 176    | 0.06   |
| 19.050 | 49742   | 0.70   | 1020   | 0.35   |
| 37.117 | 12082   | 0.17   | 206    | 0.07   |
| 40.883 | 23358   | 0.33   | 292    | 0.10   |
| 56.983 | 3566    | 0.05   | 102    | 0.03   |
| 57.267 | 3208    | 0.05   | 96     | 0.03   |
| 58.017 | 1226    | 0.02   | 56     | 0.02   |
| Totals |         |        |        |        |
|        | 7108081 | 100.00 | 294370 | 100.00 |

HPLC method B (isocratic; MeOH:H<sub>2</sub>O 65:35, 60 min; 0.1% TFA): r.t. = 11.40 min, purity = 97.9%.

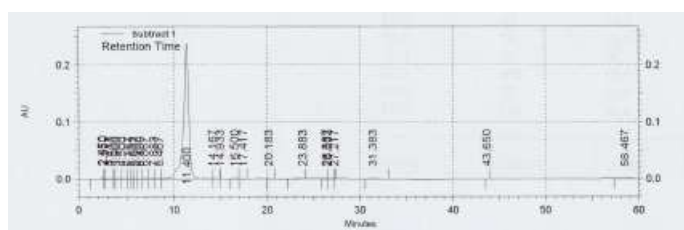

| Time  | Area  | Area % | Height | Height % |
|-------|-------|--------|--------|----------|
| 2.450 | 16814 | 0.18   | 1808   | 0.74     |
| 2.550 | 10996 | 0.11   | 1519   | 0.62     |
| 3.117 | 25679 | 0.27   | 946    | 0.39     |
| 3.500 | 5995  | 0.06   | 377    | 0.15     |
| 3.900 | 11170 | 0.12   | 354    | 0.14     |
| 4.500 | 9967  | 0.10   | 324    | 0.13     |
| 5.167 | 6706  | 0.07   | 303    | 0.12     |
| 5.633 | 3550  | 0.04   | 245    | 0.10     |
| 5.867 | 4875  | 0.05   | 239    | 0.10     |
| 6.400 | 5476  | 0.06   | 206    | 0.08     |
| 6.867 | 8095  | 0.08   | 228    | 0.09     |
| 7.883 | 8861  | 0.09   | 244    | 0.10     |
| 8.467 | 11862 | 0.12   | 392    | 0.16     |

|        |         |        |        |        |
|--------|---------|--------|--------|--------|
| 11.400 | 9374683 | 97.86  | 237012 | 96.55  |
| 14.167 | 3150    | 0.03   | 135    | 0.05   |
| 14.933 | 81      | 0.00   | 25     | 0.01   |
| 16.500 | 4249    | 0.04   | 125    | 0.05   |
| 17.417 | 2615    | 0.03   | 82     | 0.03   |
| 20.183 | 1568    | 0.02   | 56     | 0.02   |
| 23.883 | 4551    | 0.05   | 63     | 0.03   |
| 26.367 | 1595    | 0.02   | 71     | 0.03   |
| 26.533 | 1547    | 0.02   | 67     | 0.03   |
| 27.217 | 91      | 0.00   | 22     | 0.01   |
| 31.383 | 18918   | 0.20   | 270    | 0.11   |
| 43.650 | 355     | 0.00   | 23     | 0.01   |
| 58.467 | 36576   | 0.38   | 343    | 0.14   |
| Totals |         |        |        |        |
|        | 9580025 | 100.00 | 245481 | 100.00 |

### 5-((3-Bromophenoxy)methyl)-1*H*-pyrazol-3(2*H*)-one (17)

HPLC method A (isocratic; MeCN:H<sub>2</sub>O 40:60, 60 min; 0.1% TFA): r.t. = 5.83 min, purity = 95.2%.

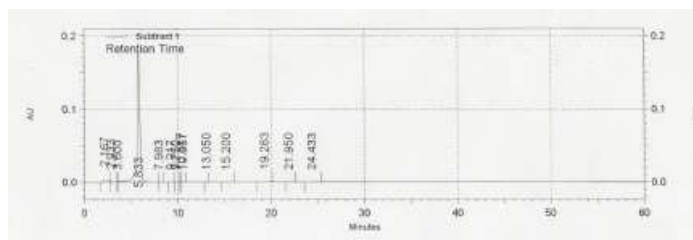

| Time   | Area    | Area % | Height | Height % |
|--------|---------|--------|--------|----------|
| 2.167  | 115980  | 3.12   | 4345   | 2.25     |
| 2.933  | 19644   | 0.53   | 937    | 0.48     |
| 3.600  | 3412    | 0.09   | 299    | 0.15     |
| 5.833  | 3536563 | 95.23  | 186646 | 96.54    |
| 7.983  | 1551    | 0.04   | 87     | 0.04     |
| 9.217  | 1264    | 0.03   | 67     | 0.03     |
| 9.750  | 619     | 0.02   | 35     | 0.02     |
| 10.317 | 271     | 0.01   | 38     | 0.02     |
| 10.567 | 684     | 0.02   | 43     | 0.02     |
| 13.050 | 274     | 0.01   | 23     | 0.01     |
| 15.200 | 7484    | 0.20   | 203    | 0.10     |
| 19.283 | 14404   | 0.39   | 335    | 0.17     |
| 21.950 | 2122    | 0.06   | 70     | 0.04     |

|        |         |        |        |        |
|--------|---------|--------|--------|--------|
| 24.433 | 9409    | 0.25   | 213    | 0.11   |
| Totals | 3713681 | 100.00 | 193341 | 100.00 |

HPLC method B (isocratic; MeOH:H<sub>2</sub>O 65:35, 60 min; 0.1% TFA): r.t. = 5.15 min, purity = 97.5%.

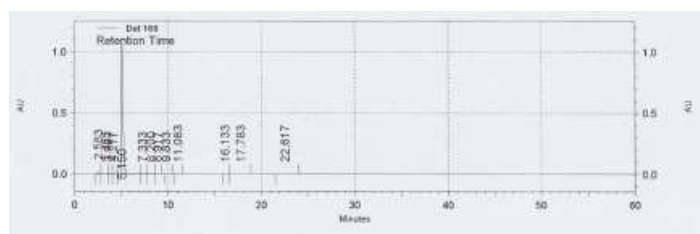

| Time   | Area     | Area % | Height  | Height % |
|--------|----------|--------|---------|----------|
| 2.583  | 134519   | 1.01   | 17397   | 1.53     |
| 3.483  | 40154    | 0.30   | 1314    | 0.12     |
| 3.767  | 30478    | 0.23   | 1631    | 0.14     |
| 4.217  | 28248    | 0.21   | 1219    | 0.11     |
| 5.150  | 12941686 | 97.47  | 1114577 | 97.87    |
| 7.333  | 7696     | 0.06   | 319     | 0.03     |
| 8.200  | 7630     | 0.06   | 361     | 0.03     |
| 8.917  | 2531     | 0.02   | 141     | 0.01     |
| 9.833  | 2030     | 0.02   | 91      | 0.01     |
| 11.083 | 1773     | 0.01   | 77      | 0.01     |
| 16.133 | 1844     | 0.01   | 67      | 0.01     |
| 17.783 | 28181    | 0.21   | 596     | 0.05     |
| 22.617 | 50348    | 0.38   | 1006    | 0.09     |

|        |          |        |         |        |
|--------|----------|--------|---------|--------|
| Totals | 13277118 | 100.00 | 1138796 | 100.00 |
|--------|----------|--------|---------|--------|

### 5-((Biphenyl-3-yloxy)methyl)-1*H*-pyrazol-3(2*H*)-one (18)

HPLC method A (isocratic; MeCN:H<sub>2</sub>O 50:50, 60 min; 0.1% TFA): r.t. = 5.03 min, purity = 95.0%.

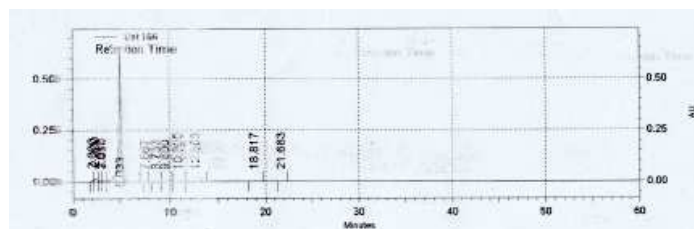

| Time   | Area     | Area % | Height | Height % |
|--------|----------|--------|--------|----------|
| 2.000  | 89655    | 0.80   | 6567   | 0.95     |
| 2.000  | 288616   | 2.58   | 14599  | 2.12     |
| 2.017  | 52518    | 0.47   | 3280   | 0.48     |
| 2.050  | 77390    | 0.69   | 3203   | 0.47     |
| 2.053  | 10620733 | 94.99  | 658931 | 95.74    |
| 7.667  | 906      | 0.01   | 60     | 0.01     |
| 8.733  | 4467     | 0.04   | 190    | 0.03     |
| 9.600  | 4529     | 0.04   | 176    | 0.03     |
| 10.800 | 9375     | 0.08   | 289    | 0.04     |
| 13.580 | 23165    | 0.21   | 691    | 0.10     |
| 18.817 | 8206     | 0.07   | 221    | 0.03     |
| 21.683 | 1694     | 0.02   | 56     | 0.01     |

|        |          |        |        |        |
|--------|----------|--------|--------|--------|
| Totals | 11181234 | 100.00 | 688263 | 100.00 |
|--------|----------|--------|--------|--------|

HPLC method B (isocratic; MeOH:H<sub>2</sub>O 65:35, 60 min; 0.1% TFA): r.t. = 7.97 min, purity = 98.6%.

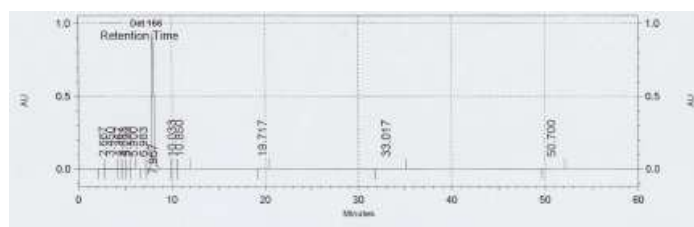

| Time   | Area     | Area % | Height | Height % |
|--------|----------|--------|--------|----------|
| 2.667  | 25717    | 0.16   | 2555   | 0.27     |
| 3.450  | 64369    | 0.40   | 2059   | 0.22     |
| 4.367  | 15433    | 0.10   | 552    | 0.06     |
| 4.883  | 13726    | 0.09   | 607    | 0.06     |
| 5.233  | 28619    | 0.18   | 2292   | 0.24     |
| 5.900  | 6215     | 0.04   | 239    | 0.03     |
| 6.983  | 4199     | 0.03   | 270    | 0.03     |
| 7.967  | 15700724 | 98.56  | 935485 | 98.93    |
| 10.033 | 10784    | 0.07   | 360    | 0.04     |
| 10.850 | 19189    | 0.12   | 633    | 0.07     |
| 19.717 | 5867     | 0.04   | 173    | 0.02     |
| 33.017 | 22459    | 0.14   | 249    | 0.03     |
| 50.700 | 13088    | 0.08   | 164    | 0.02     |

|        |          |        |        |        |
|--------|----------|--------|--------|--------|
| Totals | 15930329 | 100.00 | 945638 | 100.00 |
|--------|----------|--------|--------|--------|

### 5-((5-Phenylbiphenyl-3-yloxy)methyl)-1*H*-pyrazol-3(2*H*)-one (19)

HPLC method A (isocratic; MeCN:H<sub>2</sub>O 50:50, 60 min; 0.1% TFA): r.t. = 11.90 min, purity = 98.9%.

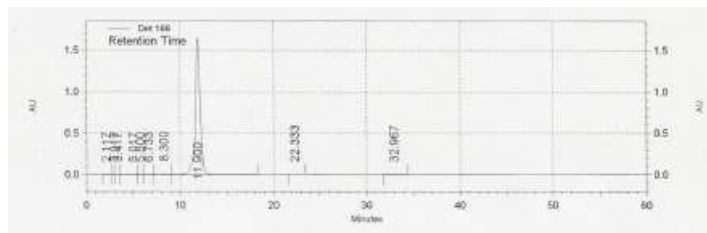

| Time   | Area     | Area % | Height  | Height % |
|--------|----------|--------|---------|----------|
| 2.117  | 77526    | 0.13   | 2231    | 0.13     |
| 3.017  | 6104     | 0.01   | 438     | 0.03     |
| 3.417  | 23275    | 0.04   | 1531    | 0.09     |
| 5.017  | 96751    | 0.16   | 1721    | 0.10     |
| 5.800  | 31518    | 0.05   | 1019    | 0.06     |
| 6.733  | 64396    | 0.11   | 1131    | 0.07     |
| 8.300  | 265502   | 0.45   | 8461    | 0.51     |
| 11.900 | 58861536 | 98.92  | 1645688 | 98.92    |
| 22.333 | 14830    | 0.02   | 325     | 0.02     |
| 32.967 | 60259    | 0.10   | 1041    | 0.06     |
| Totals | 59301697 | 100.00 | 1663586 | 100.00   |

HPLC method B (isocratic; MeOH:H<sub>2</sub>O 65:35, 60 min; 0.1% TFA): r.t. = 32.90 min, purity = 98.1%.

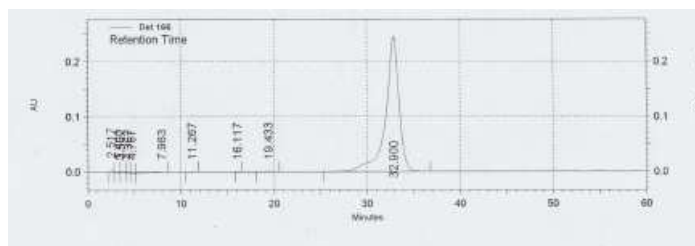

| Time   | Area     | Area % | Height | Height % |
|--------|----------|--------|--------|----------|
| 2.517  | 51730    | 0.21   | 3541   | 1.38     |
| 3.400  | 37023    | 0.15   | 1270   | 0.50     |
| 3.567  | 49933    | 0.20   | 1289   | 0.50     |
| 4.367  | 46164    | 0.18   | 1575   | 0.62     |
| 4.767  | 34610    | 0.14   | 1702   | 0.66     |
| 7.983  | 199297   | 0.79   | 508    | 0.20     |
| 11.267 | 3217     | 0.01   | 90     | 0.04     |
| 16.117 | 1029     | 0.00   | 48     | 0.02     |
| 19.433 | 55156    | 0.22   | 1093   | 0.43     |
| 32.900 | 24663517 | 98.10  | 244842 | 95.66    |
| Totals | 25141696 | 100.00 | 255958 | 100.00   |

HPLC spectra and RR data of microsomal stability for minaprine and 1.

Minaprine Haloperidol

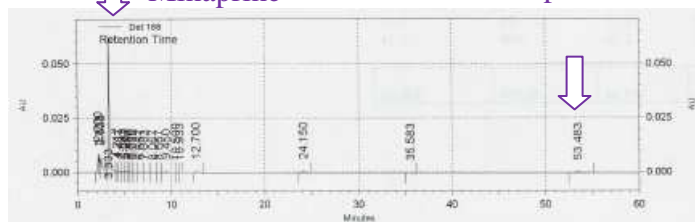

| Time  | Area   | Area % | Height | Height % |
|-------|--------|--------|--------|----------|
| 2.200 | 66116  | 7.65   | 8408   | 9.30     |
| 2.333 | 46788  | 5.41   | 6522   | 7.22     |
| 2.533 | 77155  | 8.92   | 6962   | 7.70     |
| 3.333 | 541189 | 62.58  | 62572  | 69.23    |
| 4.217 | 11057  | 1.28   | 835    | 0.92     |
| 4.467 | 5732   | 0.66   | 388    | 0.43     |
| 4.833 | 5661   | 0.65   | 427    | 0.47     |
| 5.067 | 11226  | 1.30   | 811    | 0.90     |
| 5.450 | 3991   | 0.46   | 349    | 0.39     |
| 5.700 | 4509   | 0.52   | 295    | 0.33     |
| 5.933 | 4609   | 0.53   | 213    | 0.24     |
| 6.667 | 7222   | 0.84   | 294    | 0.33     |
| 7.083 | 5226   | 0.60   | 151    | 0.17     |

|        |        |        |       |        |
|--------|--------|--------|-------|--------|
| 8.067  | 4691   | 0.54   | 128   | 0.14   |
| 8.667  | 2568   | 0.30   | 111   | 0.12   |
| 9.450  | 13043  | 1.51   | 466   | 0.52   |
| 10.500 | 584    | 0.07   | 37    | 0.04   |
| 10.933 | 520    | 0.06   | 28    | 0.03   |
| 12.700 | 8483   | 0.98   | 414   | 0.46   |
| 24.150 | 19903  | 2.30   | 599   | 0.66   |
| 35.583 | 2475   | 0.29   | 71    | 0.08   |
| 53.483 | 21983  | 2.54   | 308   | 0.34   |
| Totals |        |        |       |        |
|        | 864731 | 100.00 | 90389 | 100.00 |

**Figure S1.** Minaprine, 0 min #3, reconstituted in DMSO:H<sub>2</sub>O = 1:9, which contains haloperidol (100 µL, 100 µM).

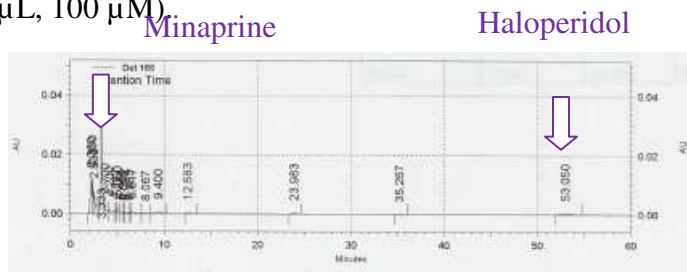

| Time  | Area   | Area % | Height | Height % |
|-------|--------|--------|--------|----------|
| 2.200 | 115156 | 12.31  | 11422  | 12.84    |
| 2.350 | 85896  | 9.18   | 12053  | 13.55    |
| 2.533 | 87305  | 9.33   | 7679   | 8.63     |
| 3.333 | 424978 | 45.44  | 46025  | 51.73    |
| 3.700 | 37268  | 3.98   | 2655   | 2.98     |
| 4.200 | 27791  | 2.97   | 1706   | 1.92     |
| 4.817 | 8307   | 0.89   | 709    | 0.80     |
| 5.050 | 21863  | 2.34   | 1792   | 2.01     |
| 5.433 | 7699   | 0.82   | 606    | 0.68     |
| 5.667 | 3363   | 0.36   | 736    | 0.38     |
| 5.900 | 6945   | 0.74   | 319    | 0.36     |
| 6.383 | 4441   | 0.47   | 411    | 0.46     |
| 6.617 | 17440  | 1.86   | 913    | 1.03     |

|        |        |        |       |        |
|--------|--------|--------|-------|--------|
| 8.067  | 5021   | 0.54   | 141   | 0.16   |
| 9.400  | 16758  | 1.79   | 719   | 0.81   |
| 12.583 | 9927   | 1.06   | 464   | 0.52   |
| 23.983 | 14905  | 1.59   | 437   | 0.49   |
| 35.267 | 3526   | 0.38   | 89    | 0.10   |
| 53.050 | 36749  | 3.93   | 497   | 0.56   |
| Totals |        |        |       |        |
|        | 935338 | 100.00 | 88973 | 100.00 |

**Figure S2.** Minaprine, 20 min #3, reconstituted in DMSO:H<sub>2</sub>O = 1:9, which contains haloperidol (100 µL, 100 µM).

1

Haloperidol



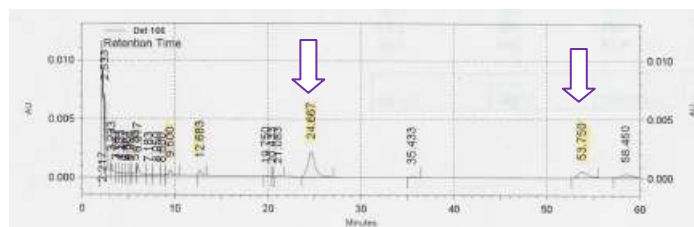

| Time  | Area   | Area % | Height | Height % |
|-------|--------|--------|--------|----------|
| 2.217 | 165198 | 30.74  | 11671  | 42.74    |
| 2.533 | 81161  | 15.10  | 7179   | 26.29    |
| 3.233 | 17706  | 3.30   | 1100   | 4.03     |
| 3.667 | 5777   | 1.08   | 397    | 1.45     |
| 4.133 | 7476   | 1.39   | 321    | 1.18     |
| 4.467 | 4617   | 0.86   | 266    | 0.97     |
| 4.867 | 7036   | 1.31   | 320    | 1.17     |
| 5.250 | 3442   | 0.64   | 246    | 0.90     |
| 5.733 | 7042   | 1.31   | 329    | 1.20     |
| 6.017 | 20906  | 3.89   | 1006   | 3.68     |
| 7.183 | 5872   | 1.09   | 148    | 0.54     |
| 8.050 | 4949   | 0.92   | 114    | 0.42     |
| 8.600 | 1705   | 0.32   | 84     | 0.31     |

|        |        |        |       |        |
|--------|--------|--------|-------|--------|
| 9.500  | 12385  | 2.30   | 531   | 1.94   |
| 12.683 | 9940   | 1.85   | 471   | 1.72   |
| 19.750 | 1317   | 0.25   | 44    | 0.16   |
| 20.433 | 138    | 0.03   | 23    | 0.08   |
| 21.083 | 1401   | 0.26   | 46    | 0.17   |
| 24.667 | 114693 | 21.35  | 2151  | 7.88   |
| 35.433 | 4777   | 0.89   | 109   | 0.40   |
| 53.750 | 36753  | 6.84   | 490   | 1.79   |
| 58.450 | 23037  | 4.29   | 260   | 0.95   |
| Totals | 537328 | 100.00 | 27306 | 100.00 |

**Figure S3.** Compound 1, 0 min #2, reconstituted in DMSO:H<sub>2</sub>O = 1:9, which contains haloperidol (100  $\mu$ L, 100  $\mu$ M).

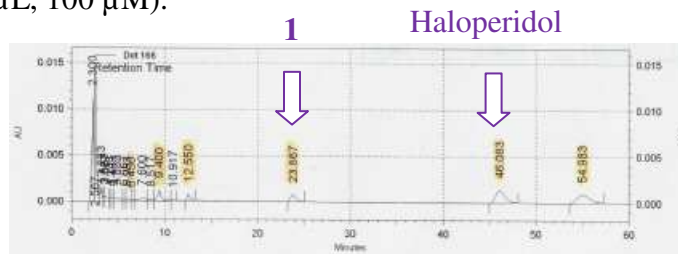

| Time  | Area   | Area % | Height | Height % |
|-------|--------|--------|--------|----------|
| 2.300 | 150915 | 21.77  | 11147  | 31.51    |
| 2.567 | 184310 | 26.59  | 14765  | 41.73    |
| 3.233 | 15203  | 2.19   | 1379   | 3.90     |
| 3.533 | 6248   | 0.90   | 514    | 1.45     |
| 3.667 | 11432  | 1.65   | 505    | 1.43     |
| 4.133 | 4032   | 0.58   | 305    | 0.86     |
| 4.483 | 3181   | 0.46   | 257    | 0.73     |
| 4.833 | 15332  | 2.21   | 369    | 1.04     |
| 5.667 | 5097   | 0.74   | 311    | 0.88     |
| 5.983 | 6125   | 0.88   | 223    | 0.63     |
| 6.450 | 3427   | 0.49   | 165    | 0.47     |
| 7.600 | 16300  | 2.35   | 340    | 0.96     |
| 8.517 | 6671   | 0.96   | 185    | 0.52     |

|        |        |        |       |        |
|--------|--------|--------|-------|--------|
| 9.400  | 33840  | 4.88   | 1116  | 3.15   |
| 10.917 | 1332   | 0.19   | 63    | 0.18   |
| 12.550 | 15000  | 2.16   | 679   | 1.92   |
| 23.867 | 28938  | 4.17   | 743   | 2.10   |
| 46.083 | 97694  | 14.09  | 1385  | 3.91   |
| 54.983 | 88091  | 12.71  | 929   | 2.63   |
| Totals | 693168 | 100.00 | 35380 | 100.00 |

**Figure S4.** Compound **1**, 20 min #1, reconstituted in DMSO:H<sub>2</sub>O = 1:9, which contains haloperidol (100 µL, 100 µM).

**Table S1.** Raw data for microsomal stability study with minaprine and **1**

| Sample Name | Time (min) | No | Analyte retention time (min) | Analyte Peak Area | Haloperidol retention time (min) | Haloperidol Peak Area | RR    |
|-------------|------------|----|------------------------------|-------------------|----------------------------------|-----------------------|-------|
| Minaprine   | 0          | #1 | 3.367                        | 450935            | 53.567                           | 19994                 | 22.55 |
|             |            | #2 | 3.350                        | 536553            | 53.750                           | 24992                 | 21.47 |
|             |            | #3 | 3.333                        | 541189            | 53.483                           | 21983                 | 24.62 |
|             | 20         | #1 | 3.333                        | 512171            | 53.333                           | 44233                 | 11.58 |
|             |            | #2 | 3.333                        | 565219            | 53.350                           | 32329                 | 17.48 |
|             |            | #3 | 3.333                        | 424978            | 53.050                           | 36749                 | 11.56 |
| <b>1</b>    | 0          | #1 | 24.750                       | 80053             | 53.850                           | 44525                 | 2.667 |
|             |            | #2 | 24.667                       | 114693            | 53.750                           | 36753                 | 3.121 |
|             |            | #3 | 24.633                       | 91344             | 46.233                           | 34255                 | 1.798 |
|             | 20         | #1 | 23.867                       | 28938             | 46.083                           | 97694                 | 0.296 |
|             |            | #2 | 23.967                       | 19676             | 46.100                           | 64179                 | 0.307 |
|             |            | #3 | 23.900                       | 17720             | 46.150                           | 52317                 | 0.339 |

**Table S2.** Microsomal stability data processing of minaprine and **1**

| Sample Name | RR Mean | % Mean ± S.E. |
|-------------|---------|---------------|
| Mina 0 min  | 22.88   | 100 ± 7.11    |

|             |       |             |
|-------------|-------|-------------|
| Mina 20 min | 13.54 | 59.2 ± 14.9 |
| 1 0 min     | 2.529 | 100 ± 26.4  |
| 1 20min     | 0.314 | 12.4 ± 0.89 |

### Metabolite profiling of 1 and 3

Only one new peak/metabolite was observed from either test agent **1** or **3** from microsomal incubation (Figure S5). Comparing the total ion current spectra of microsomal incubation with test agents to the ones with blank at 30 min., no new peaks were identified beyond the peaks at retention time 1.7 min (the unmetabolized parent **1** or **3**), and retention time 1.4 min (the new peak/metabolite).

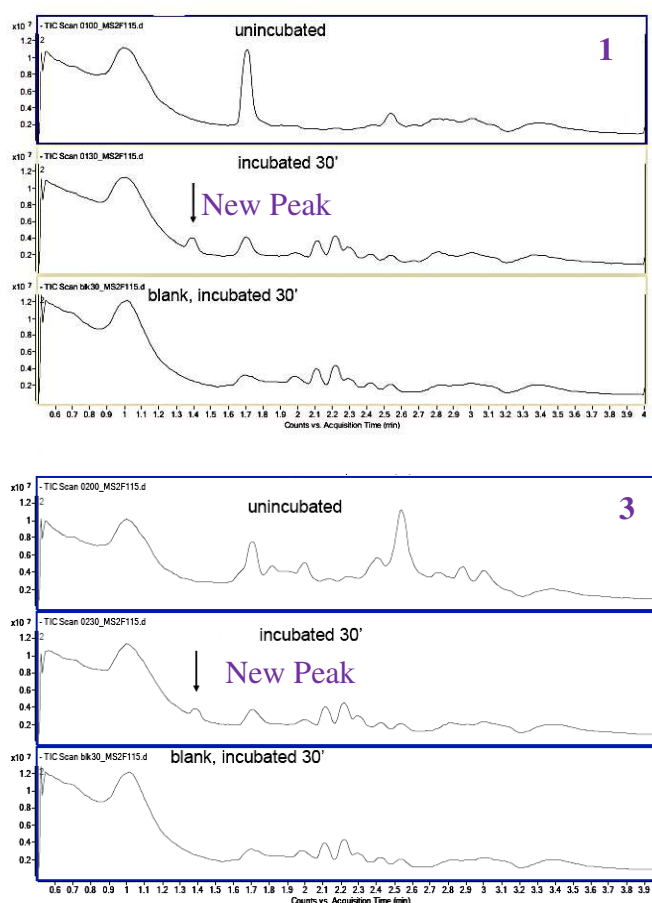

**Figure S5.** Total ion current chromatogram of MS2 full mass scan on samples incubated for 0 min (top) and 30 min (middle) with rat liver microsomes or blank microsomes (bottom). Microsomes were incubated with **1** (top panel) and **3** (bottom panel).

The complete parent molecular ion mass spectrum was then analyzed for the new peak that eluted at 1.4 min. The spectra are shown below. These spectra show that the new peak/metabolite shows a molecular ion ( $M-H$ )<sup>-</sup> of 255 (from **1**) and 257 (from **3**), which indicates the addition of oxygen to the parent compound (Figure S6).

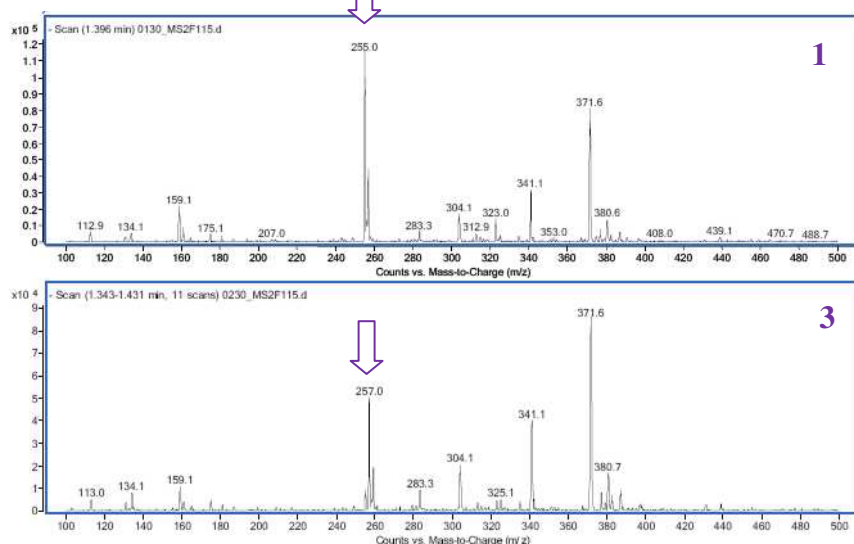

**Figure S6.** Mass spectra of new peak/metabolite from **1** (top) and **3** (bottom).

A product ion scan was run on the samples (peak  $m/z$  = 255 for **1**; peak  $m/z$  = 257 for **3**) to look for the generation of fragment ions in the mass spectrometer. The results of these scans show both test agents generated fragment ion of  $m/z$  = 159 (Figure S7).

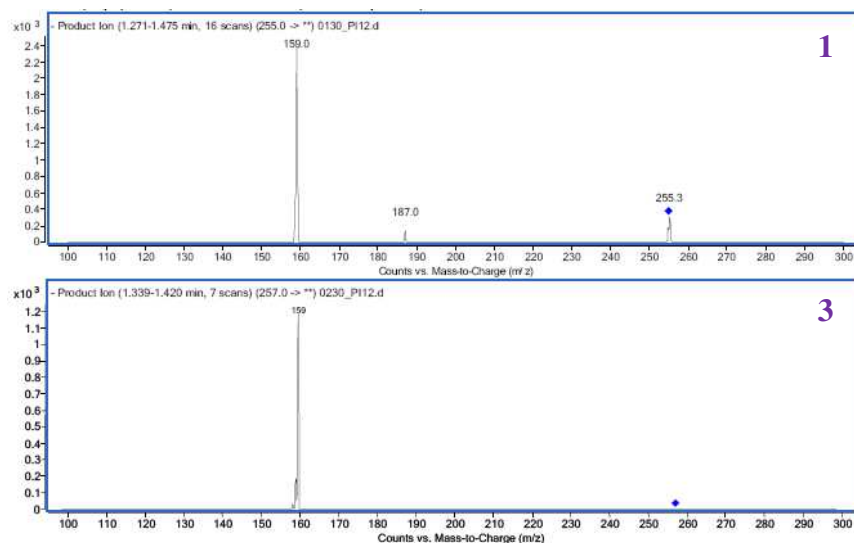

**Figure S7.** Production ion scan of new peak/metabolite (r.t. = 1.4 min) for **1** (top) and **3** (bottom) from microsomal incubation.

To confirm the identity of **4** as a direct metabolite of **1** from microsomal incubation, an authentic sample of **4** was tested under identical mass spectrometric and chromatographic conditions (Figure S8 and S9).

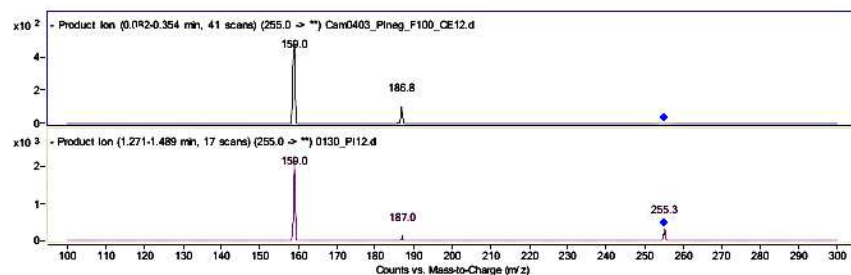

**Figure S8.** Product ion spectrum of authentic **4** (top) and of the new peak/metabolite of **1** (bottom) from microsomal incubation.

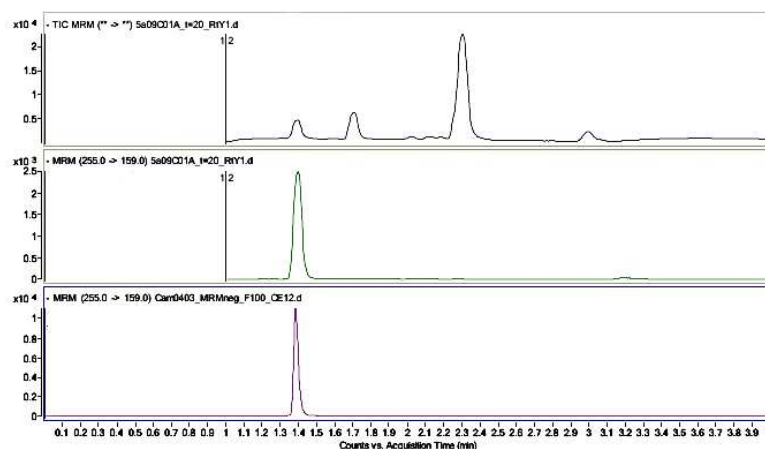

**Figure S9.** Total ion current chromatogram of microsomal incubation with **1** (top), of the new peak/metabolite, MRM, extracted from first chromatogram (middle), and of authentic **4** (bottom).

Rat liver microsomal stability data in the presence of NADPH with **1** and **3** are shown in Table S3. Compounds **1** and **3** showed poor rat liver microsomal stability, corresponding to the previous rat liver microsomal stability data for **1** by the HPLC detection method.

**Table S3.** Microsomal intrinsic clearance summary for **1** and **3** in the presence of NADPH

| ID        | Test concentration (μM) | Cl <sub>int</sub> <sup>a</sup> (mL/min/kg) | T <sub>1/2</sub> (min) <sup>b</sup> | comment                    |
|-----------|-------------------------|--------------------------------------------|-------------------------------------|----------------------------|
| Verapamil | 1                       | > 400                                      | < 3.3                               | highly metabolized control |
| Warfarin  | 1                       | < 8                                        | > 180                               | poorly metabolized control |

|                    |   |     |     |  |
|--------------------|---|-----|-----|--|
| <b>1</b>           | 5 | 192 | 7.3 |  |
| <b>3</b>           | 5 | 195 | 7.2 |  |
| <b>1/3 mixture</b> | 5 | 169 | 8.3 |  |

<sup>a</sup>The intrinsic clearance was calculated as follows:  $CL'_{int} = (0.693/T_{1/2}) \times (\text{mL incubation/mg microsomal protein}) \times (\text{mg microsomal protein/g liver}) \times (\text{g liver/kg bodyweight})$ .<sup>2</sup> Reaction mixture contained 1 mg/mL microsomal protein. The scale-up factor for microsomes protein to g of liver is 45 mg/g of liver.<sup>3</sup> Liver weights used for rats were 45 g/kg body weight.<sup>4</sup> <sup>b</sup>Half-life.

### **In vivo mouse steady-state level study and in vivo blood brain barrier study of 13.**

(All bioanalysis was done by Apredica, Watertown, MA)

To assess levels of drug present in blood and brain tissue specimens, a 50 mg/kg dose was peritoneal administered to wild-type B6SJL mice (n = 6). An untreated group (n = 6) was used as a negative control. Blood and brain were removed 1 h after injection and rapidly quenched at -80 °C. Specimens were subsequently mixed with extraction buffer (100% ice-cold methanol), sonicated on ice for 20 s, and then spun and analyzed using a Ceas 16 channel EC-HPLC. Experiments were performed in accordance with the National Institutes of Health Guide for the Care and Use of Laboratory Animals.

Blood samples were thawed on ice and kept at 4 °C. Blood samples from animals treated with test agent were diluted 50-fold in control blood prior to analysis. An aliquot of blood (25 µL) was mixed with an equal volume of water, and 150 µL methanol containing internal standard was added to precipitate the proteins. Brain samples were weighed, diluted with an equal volume of PBS (phosphate buffered saline, pH 7.2) and homogenized. Brain homogenates from test agent-treated animals were diluted 50-fold with commercial control brain homogenate prior to analysis.

A calibration curve was prepared in each media (blood and brain homogenate). Control blood and brain homogenate (from a commercial source) was used to prepare the calibration standards. Calibration samples were prepared by diluting 50x stock solution in DMSO with matrix to the appropriate concentration. Stock solutions were prepared by serial dilution according to the table S4.

**Table S4.** Stock solution preparation

| Nominal concentration (nM) | Stock concentration (µM) |
|----------------------------|--------------------------|
| 0.254                      | 0.0127                   |

|       |        |
|-------|--------|
| 0.762 | 0.0381 |
| 2.29  | 0.114  |
| 6.86  | 0.343  |
| 20.6  | 1.03   |
| 61.7  | 3.09   |
| 185   | 9.26   |
| 556   | 28     |
| 1667  | 83     |
| 5000  | 250    |

Samples were analyzed by LC/MS/MS using an Agilent 6410 mass spectrometer coupled with an Agilent 1200 HPLC and a CTC PL chilled autosampler, all controlled by MassHunter software (Agilent). After separation on a C18 reverse phase HPLC column using an acetonitrile-water gradient system, peaks were analyzed by mass spectrometry (MS) using ESI ionization in MRM mode. MassHunter software was used to calculate sample concentration using the calibration standards of known concentration.

Two calibration curves were used for blood and brain samples, depending on the concentration (Figure S10).

CMB-087229, blood. A quadratic curve fit was used to fit the experimental data.

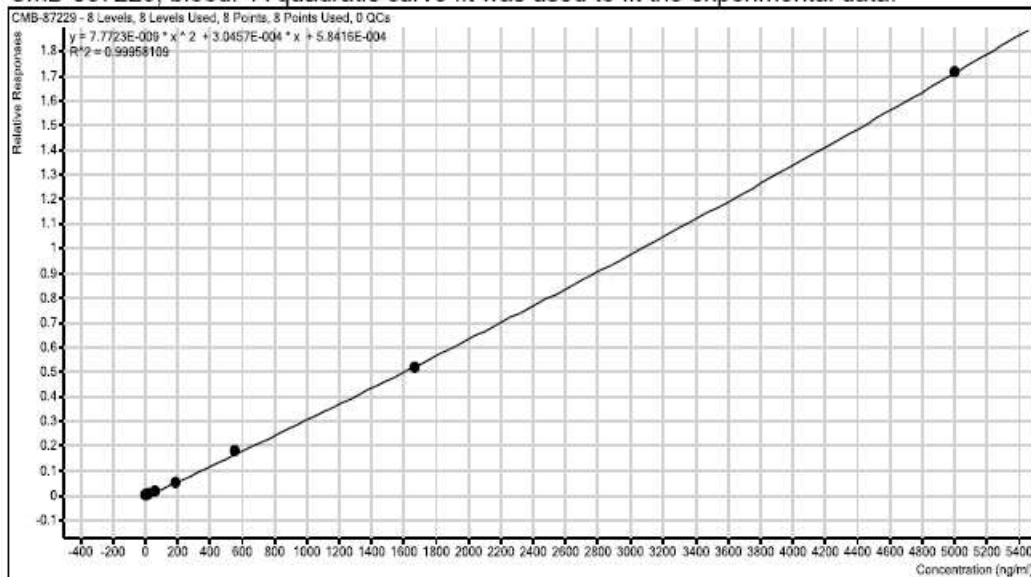

CMB-087229, brain. A quadratic curve fit was used to fit the experimental data.

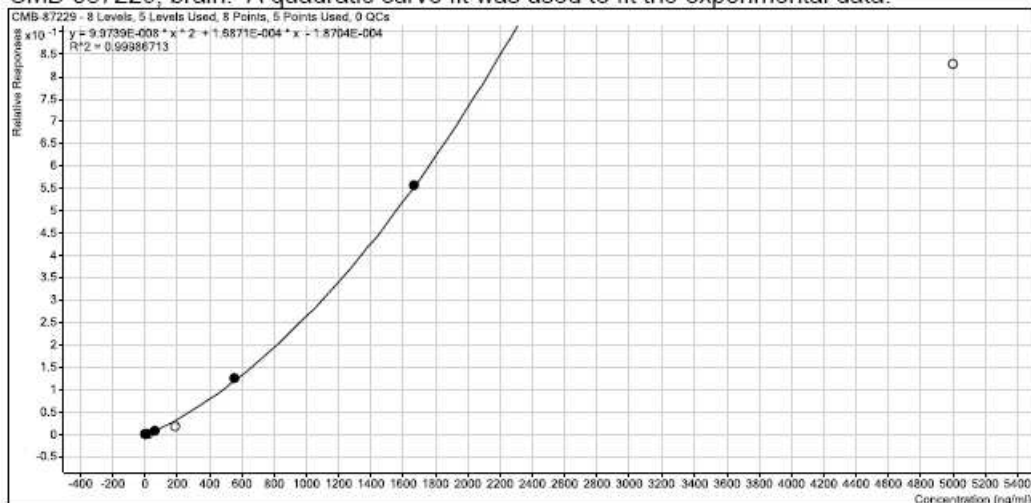

**Figure S10.** Quadratic curves for blood and brain samples.

Brain and blood sample analysis is given in Table S5. The lower limit of quantification (LLOQ) was 2.3 nM in the analytical samples. The upper limit of quantification for blood was 5000 nM in the analytical sample. The upper limit of quantification for brain homogenate was 1667 nM in the analytical sample.



| Analyte | Blood<br>(analytical<br>sample) (nM) | Blood (after<br>calibration)<br>(μM) | Brain<br>(analytical<br>sample) (nM) | Brain (after<br>calibration)<br>(μM) |
|---------|--------------------------------------|--------------------------------------|--------------------------------------|--------------------------------------|
| blank   | < LLOQ                               |                                      | < LLOQ                               |                                      |
|         | 24.3                                 |                                      | 8.3                                  |                                      |
|         | 5.2                                  |                                      | 10.1                                 |                                      |
|         | < LLOQ                               |                                      | 5.6                                  |                                      |
|         | 13.4                                 |                                      | < LLOQ                               |                                      |
|         | 108.7                                |                                      | 5.5                                  |                                      |
|         | < LLOQ                               |                                      | < LLOQ                               |                                      |
|         | 71.3                                 |                                      | 6.4                                  |                                      |
|         | 176.7                                |                                      | 27.0                                 |                                      |
|         | < LLOQ                               |                                      | 87.2                                 |                                      |
|         | 335.9                                |                                      | 4.9                                  |                                      |
|         | 106.2                                |                                      | 4.7                                  |                                      |
|         | < LLOQ                               |                                      | 4.7                                  |                                      |
|         | < LLOQ                               |                                      | < LLOQ                               |                                      |
|         | 75.4                                 |                                      | < LLOQ                               |                                      |

|  |        |  |        |  |
|--|--------|--|--------|--|
|  | < LLOQ |  | < LLOQ |  |
|--|--------|--|--------|--|

### Effect of 13 on hERG Potassium Channel

A summary of the results of each test article is shown in Table S5 below. The positive control (E-4031) confirms the sensitivity of the test system of hERG inhibition.

**Table S6.** Results of hERG inhibition

| Test Article ID | Conc. (μM) | Mean % hERG Inhibition | Standard Deviation | Standard Error | n | Individual Data Points (% Inhibition) |
|-----------------|------------|------------------------|--------------------|----------------|---|---------------------------------------|
| <b>13</b>       | 10         | 0.6                    | 2.2                | 1.5            | 2 | 2.1                                   |
|                 |            |                        |                    |                |   | -0.9                                  |
| E-4031          | 0.5        | 98.7                   | 0.7                | 0.5            | 2 | 98.2                                  |
|                 |            |                        |                    |                |   | 99.1                                  |

### Effect of 13 on Enzymes and Receptors

Radioligand binding assays for **13** (concentration = 10 μM, n = 2) were carried out by MDS Pharma Services (Taipei, Taiwan).

**Table S7.** Competitive binding assays of 13

| Target (Species)                   | Inhibition (%) | Target (Species)                                  | Inhibition (%) |
|------------------------------------|----------------|---------------------------------------------------|----------------|
| Adenosine A <sub>1</sub> (human)   | 15             | Histamine H <sub>3</sub> (human)                  | 15             |
| Adenosine A <sub>2</sub> (human)   | -2             | Imidazoline I <sub>2</sub> , Central (rat)        | 12             |
| Adenosine A <sub>3</sub> (human)   | 6              | Interleukin IL-1 (mouse)                          | 3              |
| Adrenergic α <sub>1A</sub> (rat)   | -2             | Leukotriene, Cysteinyl CysLT <sub>1</sub> (human) | 0              |
| Adrenergic α <sub>1B</sub> (rat)   | 0              | Melatonin MT <sub>1</sub> (human)                 | 3              |
| Adrenergic α <sub>1D</sub> (human) | 3              | Muscarinic M <sub>1</sub> (human)                 | 2              |
| Adrenergic α <sub>2A</sub> (human) | 8              | Muscarinic M <sub>2</sub> (human)                 | -2             |

|                                              |     |                                                      |     |
|----------------------------------------------|-----|------------------------------------------------------|-----|
| Adrenergic $\beta_1$ (human)                 | 1   | Muscarinic $M_3$ (human)                             | -4  |
| Adrenergic $\beta_2$ (human)                 | -2  | Neuropeptide Y $Y_1$ (human)                         | -1  |
| Androgen (Testosterone) AR (rat)             | 3   | Neuropeptide Y $Y_2$ (human)                         | 6   |
| Bradykinin $B_1$ (human)                     | 5   | Nicotinic Acetylcholine (human)                      | 7   |
| Bradykinin $B_2$ (human)                     | -10 | Nicotinic Acetylcholine $D_1$ , Bungarotoxin (human) | 6   |
| Calcium Channel L-Type, Benzothiazepin (rat) | -5  | Opiate $\delta$ (OP1, DOP) (human)                   | -15 |
| Calcium Channel L-Type, Dihydropyridin (rat) | -2  | Opiate $\kappa$ (OP2, KOP) (human)                   | 25  |
| Calcium Channel N-Type (rat)                 | 3   | Opiate $\mu$ (OP3, MOP) (human)                      | -9  |
| Dopamine $D_1$ (human)                       | 3   | Phorbol Ester (mouse)                                | 1   |
| Dopamine $D_{25}$ (human)                    | 14  | Platelet Activating Factor (PAF)                     | -1  |
| Dopamine $D_3$ (human)                       | -4  | Potassium Channel [KATP] (hamster)                   | -17 |
| Dopamine $D_{4.2}$ (human)                   | -3  | Potassium Channel hERG (human)                       | -7  |
| Endothelin $ET_A$ (human)                    | 3   | Prostanoid $EP_4$ (human)                            | -8  |
| Endothelin $ET_B$ (human)                    | 0   | Purinergic $P_{2x}$ (rabbit)                         | 1   |
| Epidermal Growth Factor (EGF) (human)        | 5   | Purinergic $P_{2y}$ (rat)                            | 5   |
| Estrogen $ER\alpha$ (human)                  | 10  | Rolipram (rat)                                       | -2  |
| G Protein-Coupled Receptor GPR103 (human)    | 3   | Serotonin (5-Hydroxytryptamine) 5-HT $_{1A}$ (human) | -6  |
| GABA $_A$ , Flunitrazepam, Central (rat)     | 12  | Serotonin (5-Hydroxytryptamine) 5-HT $_3$ (human)    | 7   |
| GABA $_A$ , Muscimol, Central (rat)          | 1   | Sigma $\delta_1$ (human)                             | -18 |
| GABA $_{B1A}$ (human)                        | -7  | Sigma $\delta_2$ (rat)                               | 5   |
| Glucocorticoid (human)                       | 4   | Sodium Channel, Site 2 (rat)                         | 4   |

|                                      |     |                                                             |     |
|--------------------------------------|-----|-------------------------------------------------------------|-----|
| Glutamate, Kainate (rat)             | 24  | Tachykinin NK <sub>1</sub> (human)                          | 3   |
| Glutamate, NMDA, Agonism (rat)       | -3  | Thyroid Hormone (rat)                                       | 10  |
| Glutamate, NMDA, Glycine (rat)       | 5   | Transporter, Dopamine (DAT) (human)                         | 11  |
| Glutamate, NMDA, Phencyclidine (rat) | -11 | Transporter, GABA (rat)                                     | -4  |
| Histamine H <sub>1</sub> (human)     | 1   | Transporter, Norepinephrine (NET) (human)                   | -10 |
| Histamine H <sub>2</sub> (human)     | 3   | Transporter, Serotonin (5-Hydroxytryptamine) (SERT) (human) | -6  |

## References

<sup>1</sup> Hierner, S.; Pankin, O. Edefuhr, M.; Somfai, P. Synthesis of aryl glycines by the  $\alpha$  arylation of wienreb amides, *Angew. Chem. Int. Ed.*, **2008**, 47, 1907-1909.

<sup>2</sup> Obach, R. S. Prediction of human clearance of twenty-nine drugs from hepatic microsomal intrinsic clearance data: an examination of in vitro half-life approach and nonspecific binding to microsomes, *Drug Metab. Dispos.*, **1999**, 27, 1350-1359.

<sup>3</sup> Houston, J. B. Utility of in vitro drug metabolism data in predicting in vivo metabolic clearance, *Biochem. Pharmacol.*, **1994**, 47, 1469-1479.

<sup>4</sup> Lu C., Li P., Gallegos R., Uttamsingh V., Xia C. Q., Miwa G. T., Balani S.K., Gan L. Comparison of intrinsic clearance in liver microsomes and hepatocytes from rats and humans: evaluation of free fraction and uptake in hepatocytes, *Drug Metab. Dispos.*, **2006**, 34, 1600-1605.
